# Supplementary material for: Collection and Characterization of Wood Decay Fungal Strains for Developing Pure Mycelium Mats
Source: MDPI journal article supplement (doi:10.3390/jof7121008), 2021-11-25
Supplement: s1 [file s1]

## Selection of wood decay fungal strains by TGA and SEM for developing pure mycelium mats

Cartabia Marco, Girometta Carolina Elena, Milanese Chiara, Baiguera Rebecca Michela, Buratti Simone, Branciforti Diego Savio, Dhanalakshmi Vadivel, Girella Alessandro, Babbini Stefano, Savino Elena, Dondi Daniele

### Supplementary Material

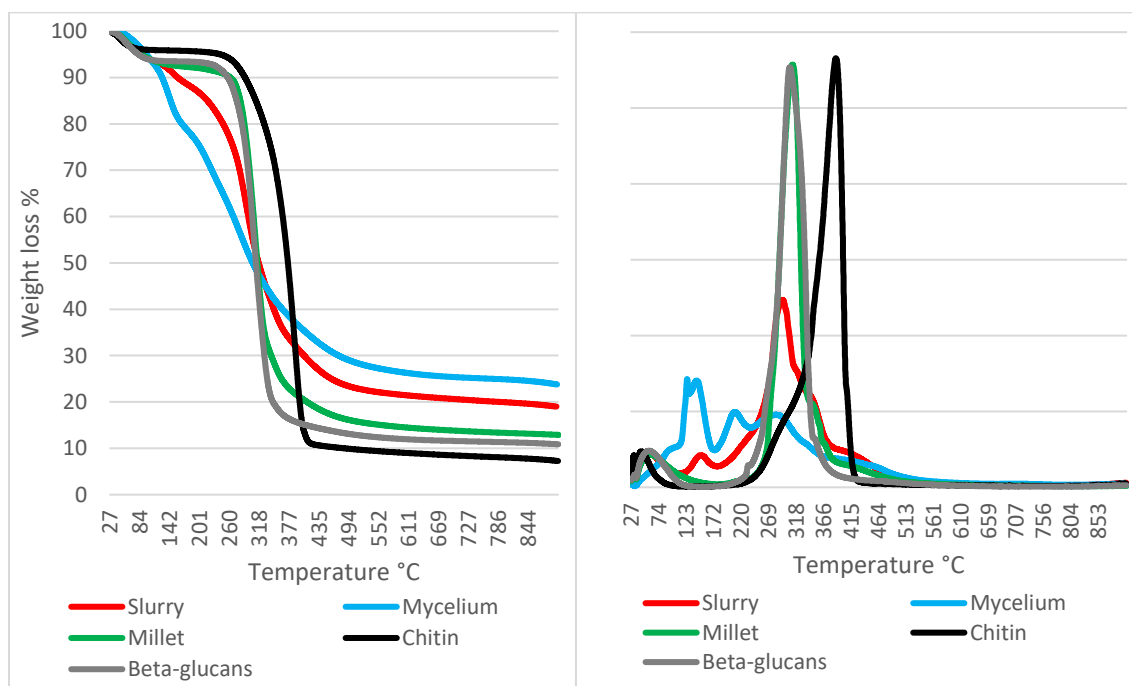

**Figure S1:** TGA (left) and DTGA (right) profiles of strain 1 (pure mycelium and slurry mat) compared to reference materials.

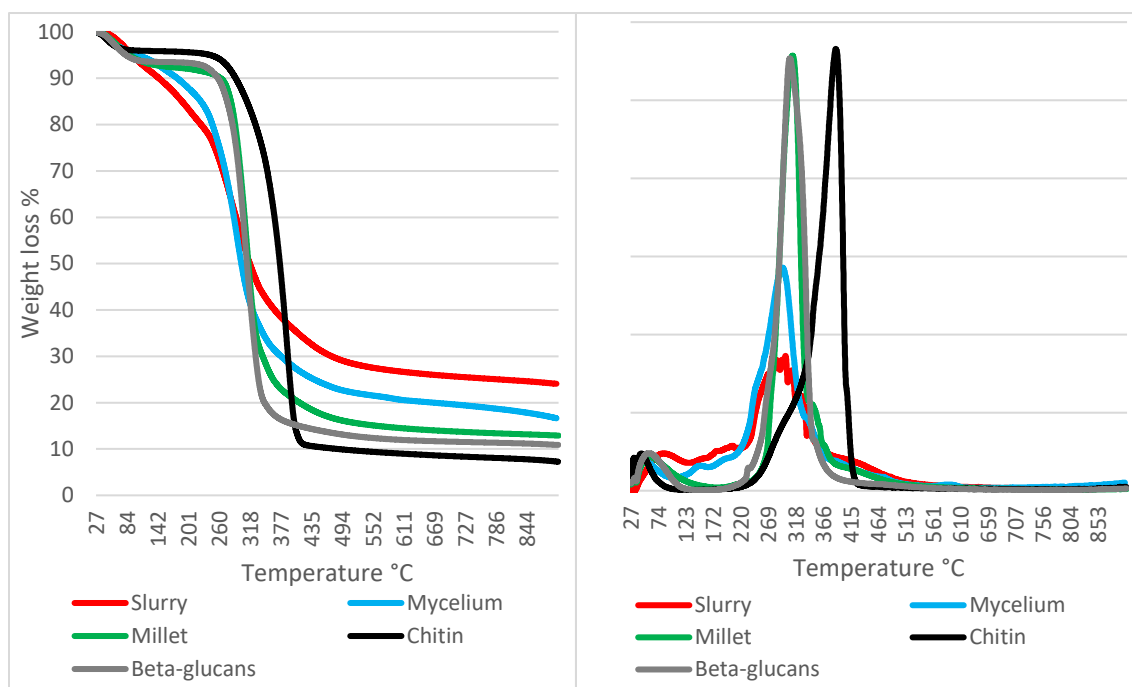

**Figure S2:** TGA (left) and DTGA (right) profiles of strain 2 (pure mycelium and slurry mat) compared to reference materials.

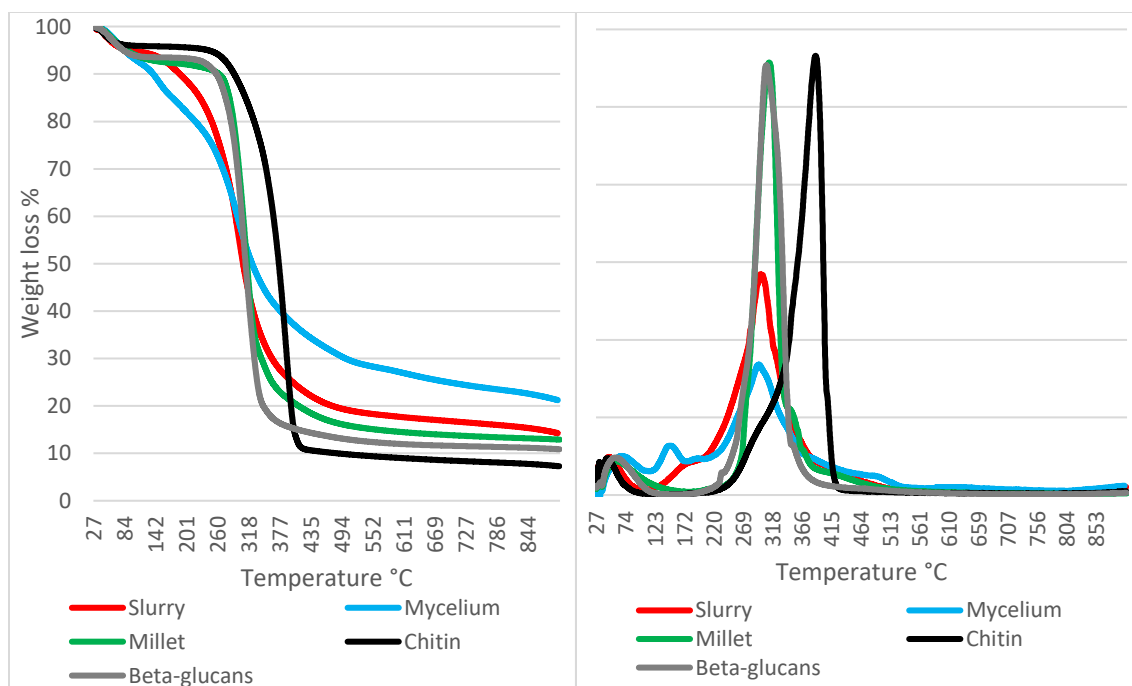

**Figure S3:** TGA (left) and DTGA (right) profiles of strain 3 (pure mycelium and slurry mat) compared to reference materials.

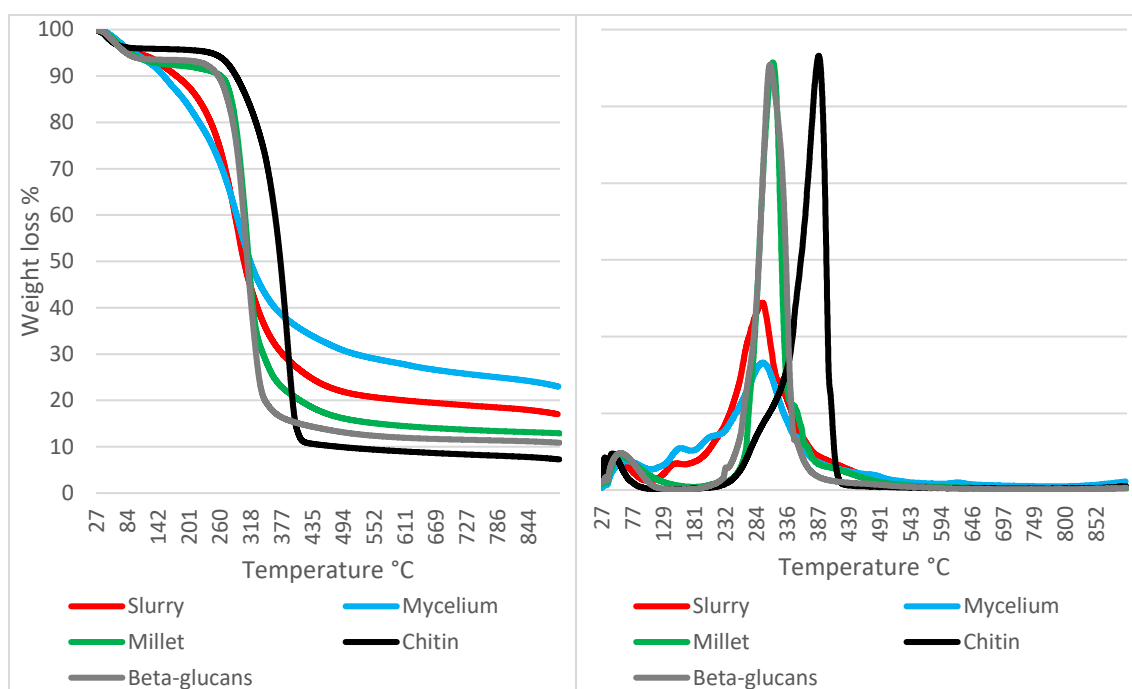

**Figure S4:** TGA (left) and DTGA (right) profiles of strain 4 (pure mycelium and slurry mat) compared to reference materials.

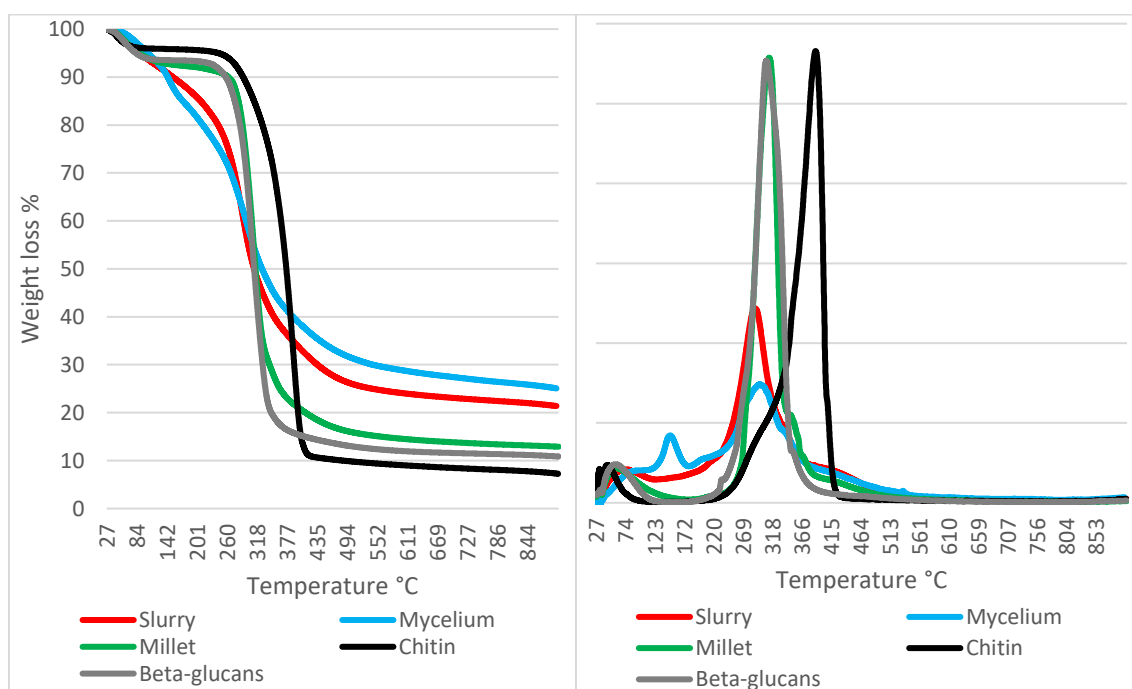

**Figure S5:** TGA (left) and DTGA (right) profiles of strain 5 (pure mycelium and slurry mat) compared to reference materials.

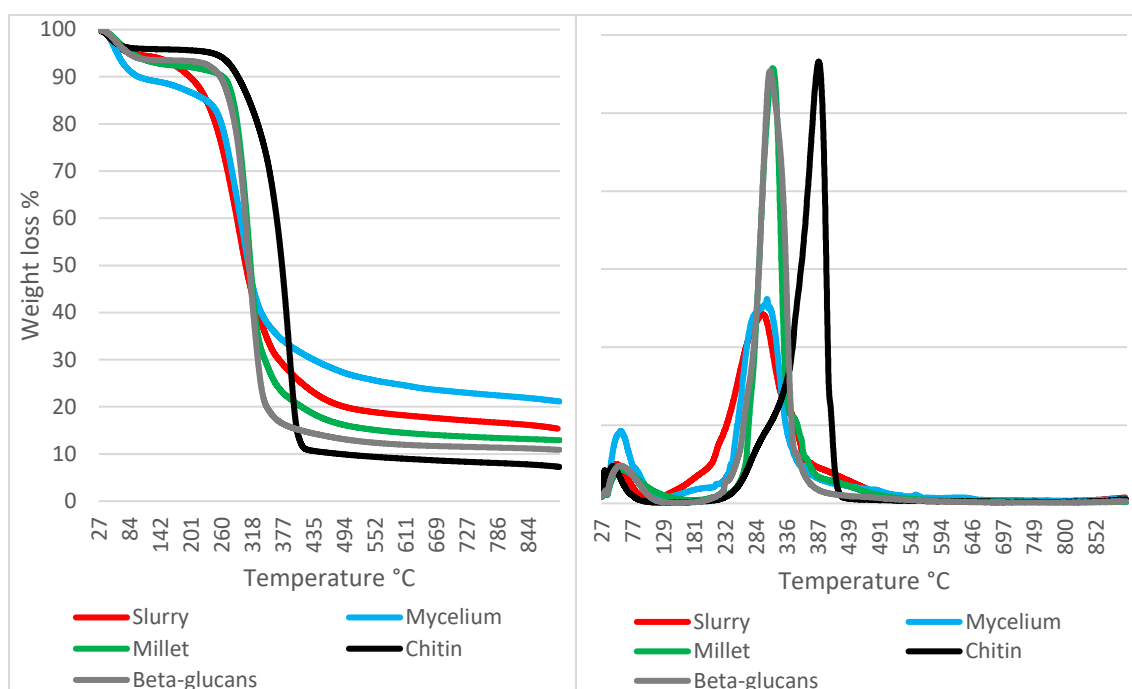

**Figure S6:** TGA (left) and DTGA (right) profiles of strain 6 (pure mycelium and slurry mat) compared to reference materials.

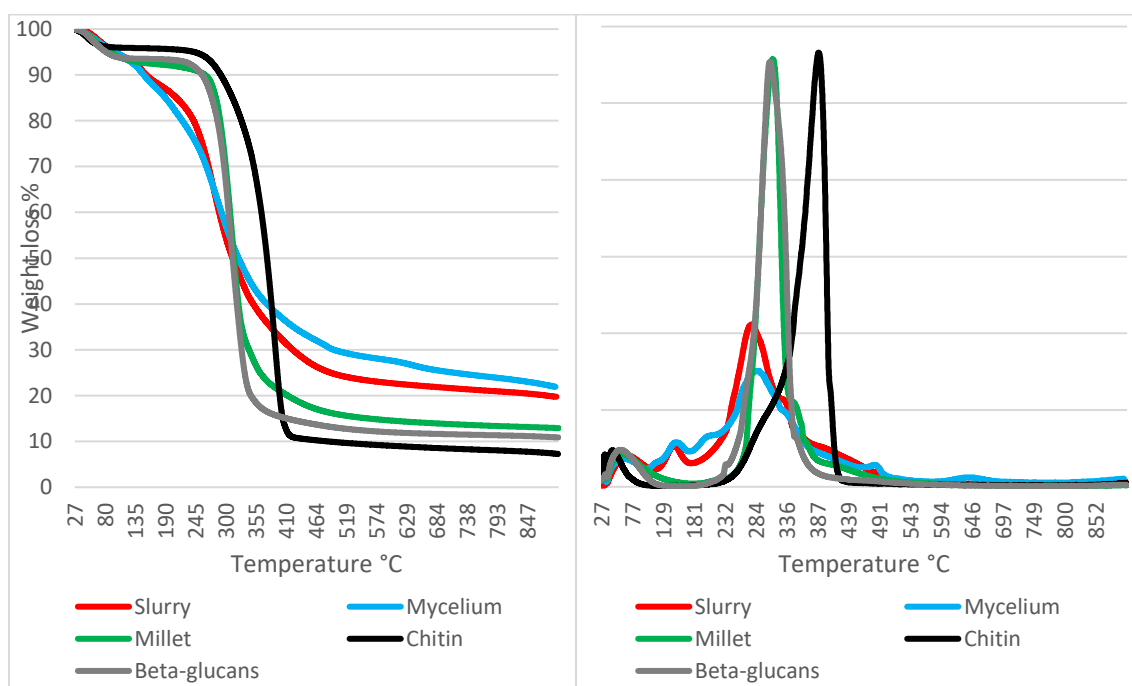

**Figure S7:** TGA (left) and DTGA (right) profiles of strain 7 (pure mycelium and slurry mat) compared to reference materials.

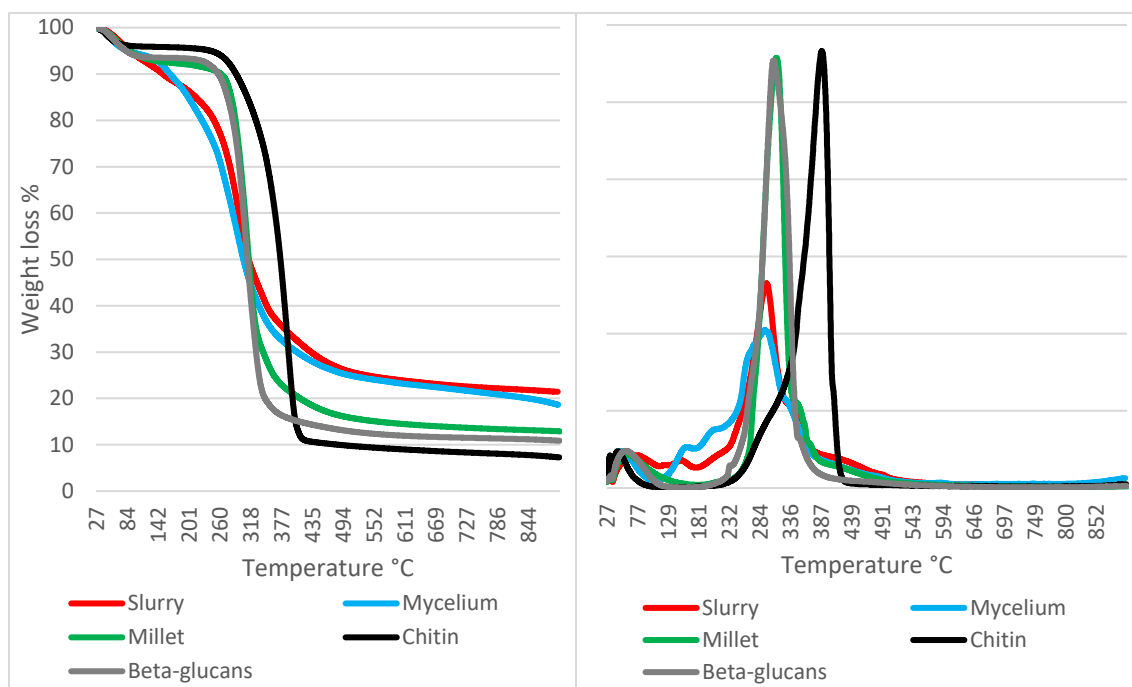

**Figure S8:** TGA (left) and DTGA (right) profiles of strain 8 (pure mycelium and slurry mat) compared to reference materials.

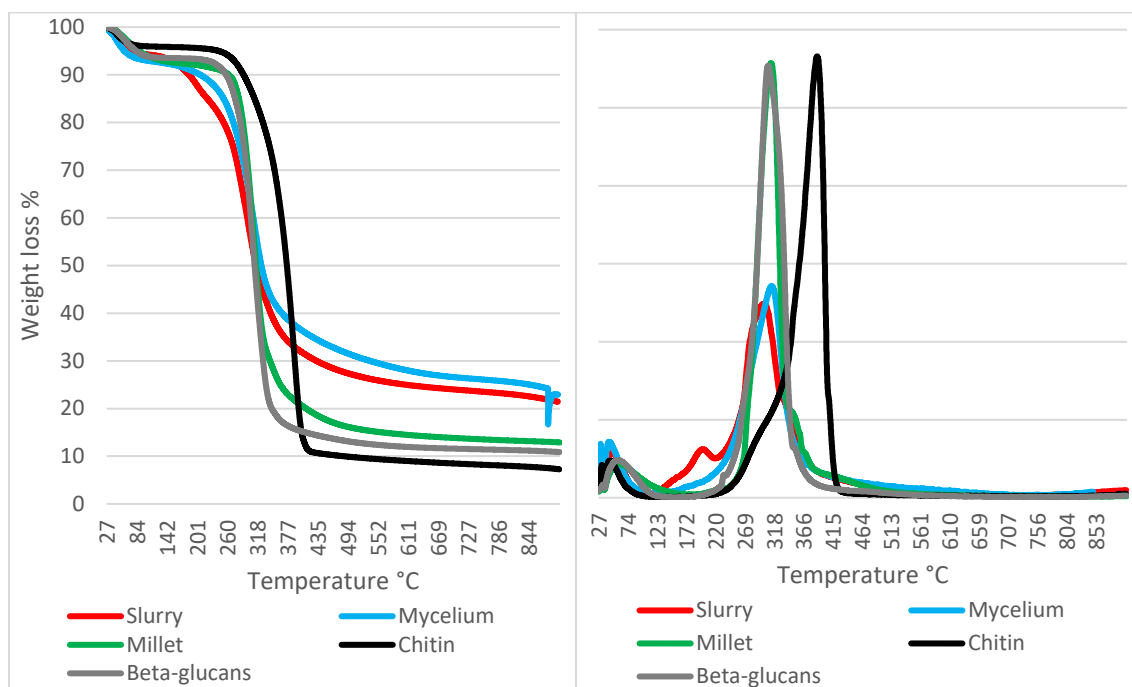

**Figure S9:** TGA (left) and DTGA (right) profiles of strain 9 (pure mycelium and slurry mat) compared to reference materials.

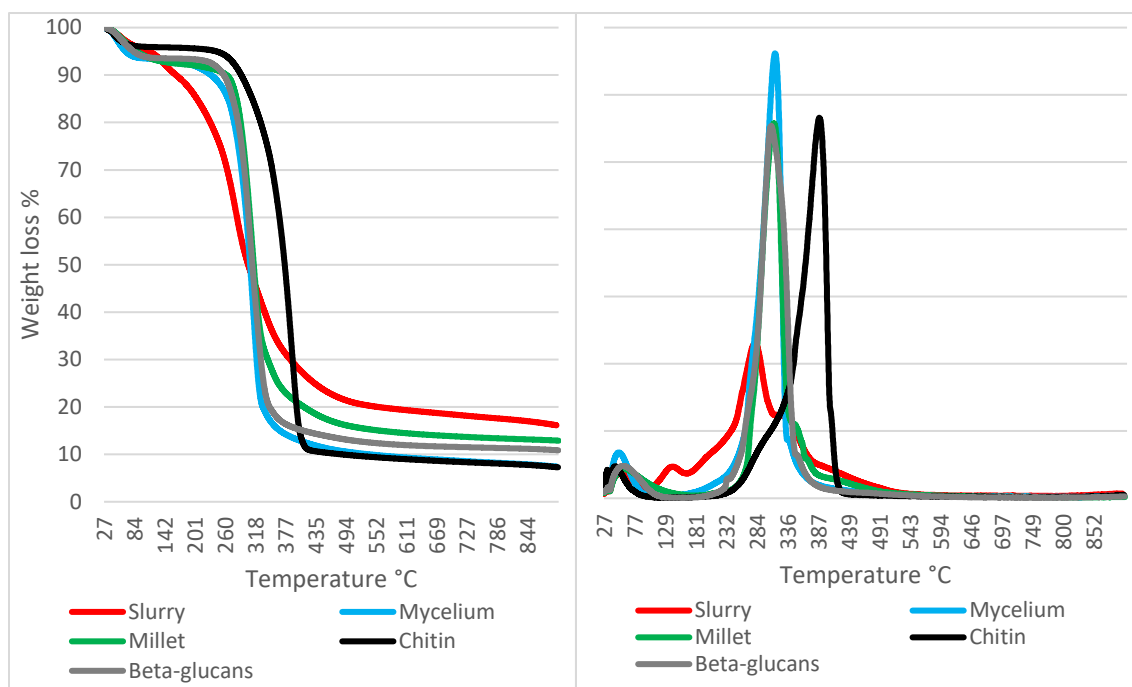

**Figure S10:** TGA (left) and DTGA (right) profiles of strain 10 (pure mycelium and slurry mat) compared to reference materials.

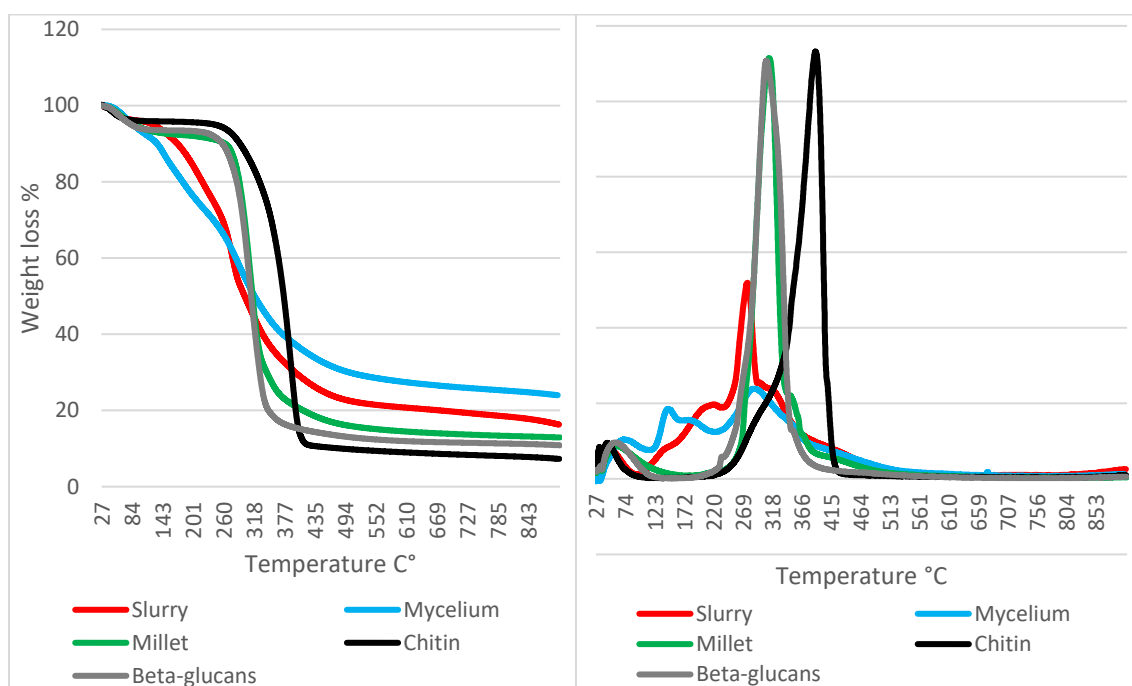

**Figure S11:** TGA (left) and DTGA (right) profiles of strain 11 (pure mycelium and slurry mat) compared to reference materials.

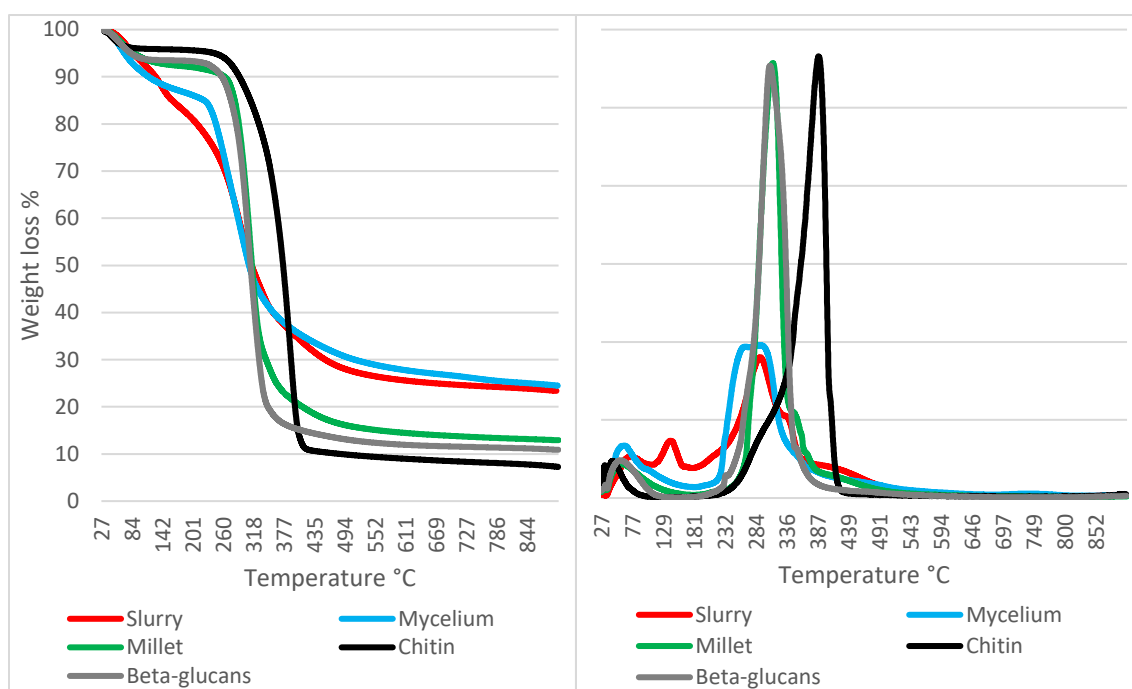

**Figure S12:** TGA (left) and DTGA (right) profiles of strain 12 (pure mycelium and slurry mat) compared to reference materials.

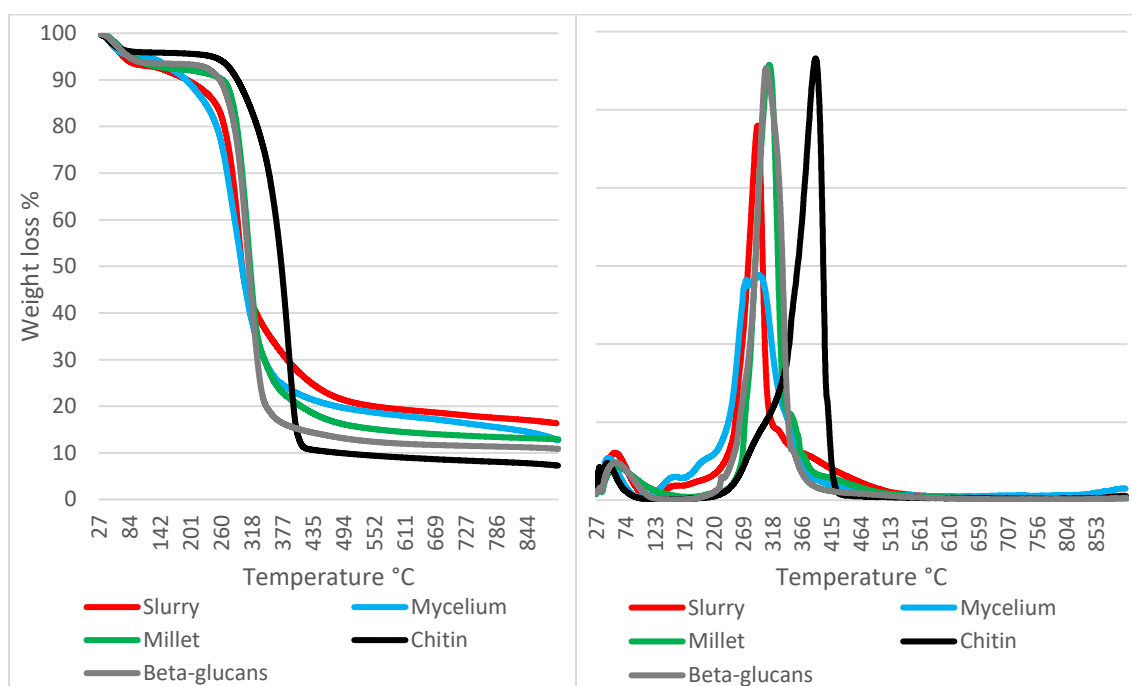

**Figure S13:** TGA (left) and DTGA (right) profiles of strain 13 (pure mycelium and slurry mat) compared to reference materials.

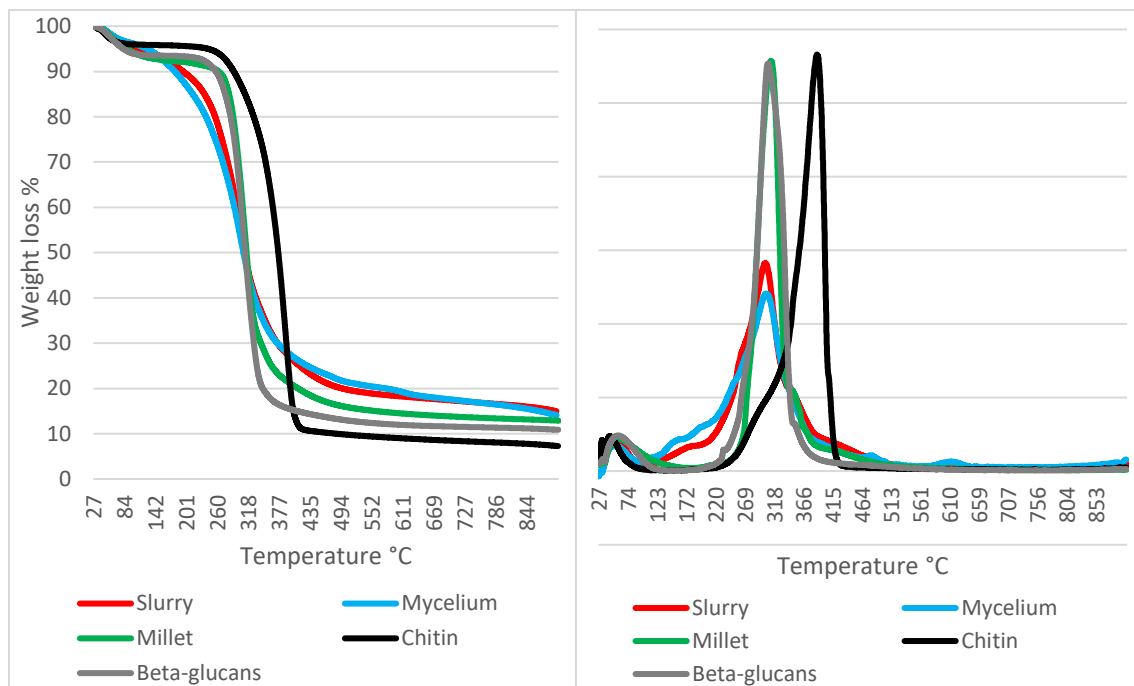

**Figure S14:** TGA (left) and DTGA (right) profiles of strain 14 (pure mycelium and slurry mat) compared to reference materials.

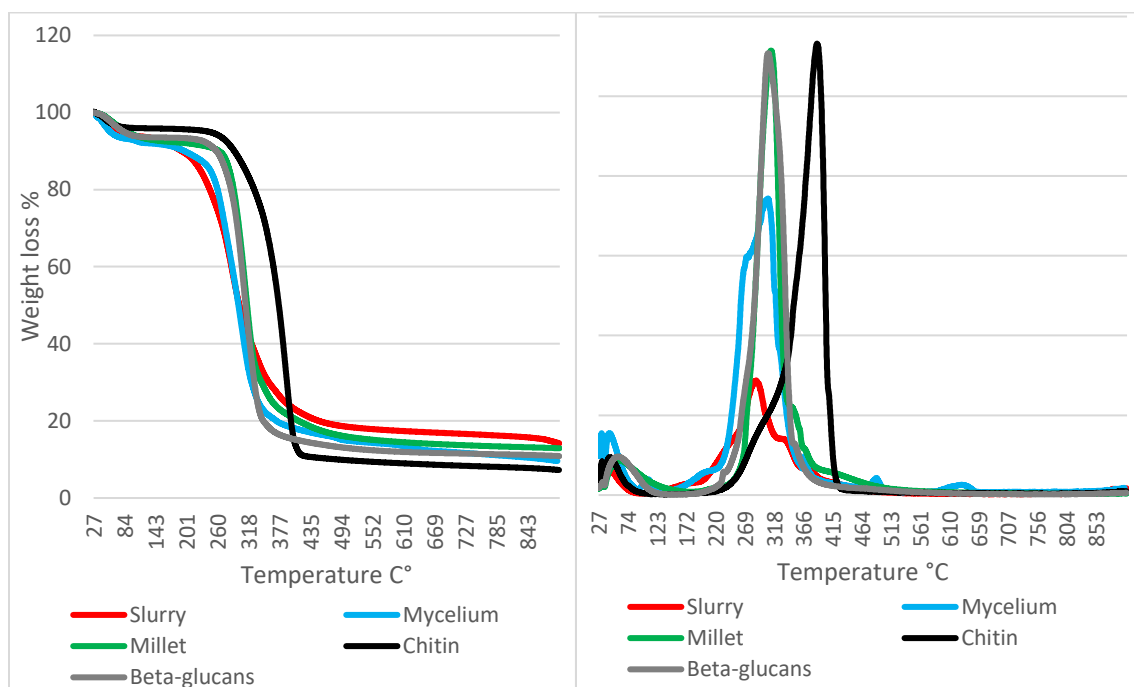

**Figure S15:** TGA (left) and DTGA (right) profiles of strain 15 (pure mycelium and slurry mat) compared to reference materials.



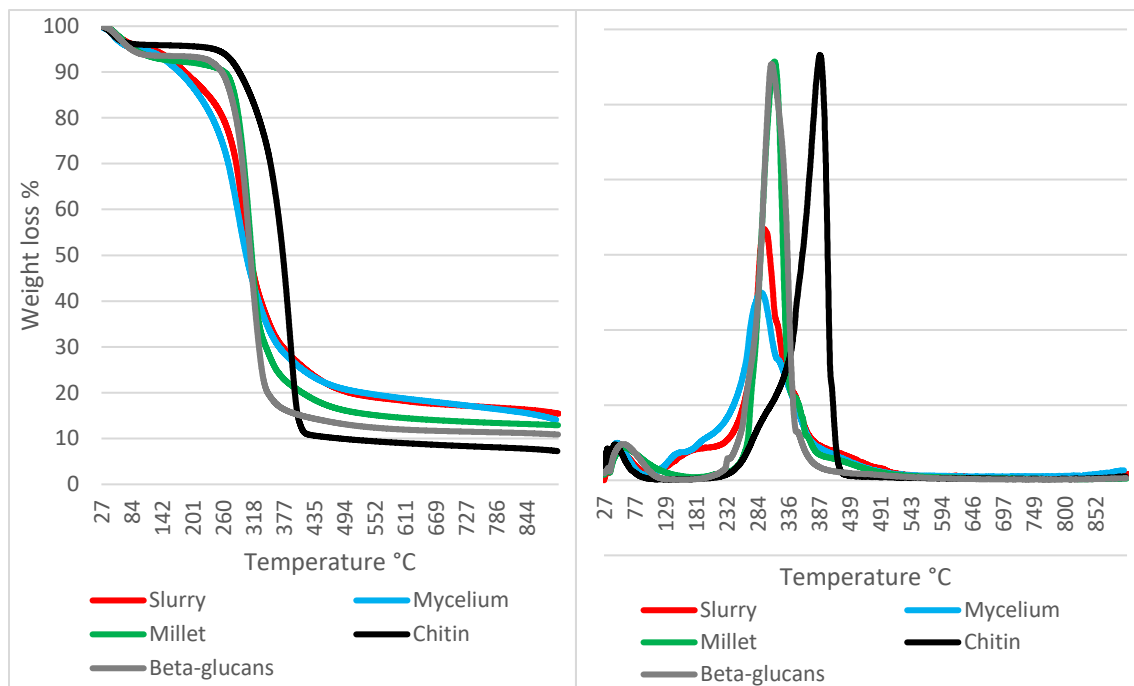

**Figure S16:** TGA (left) and DTGA (right) profiles of strain 16 (pure mycelium and slurry mat) compared to reference materials.

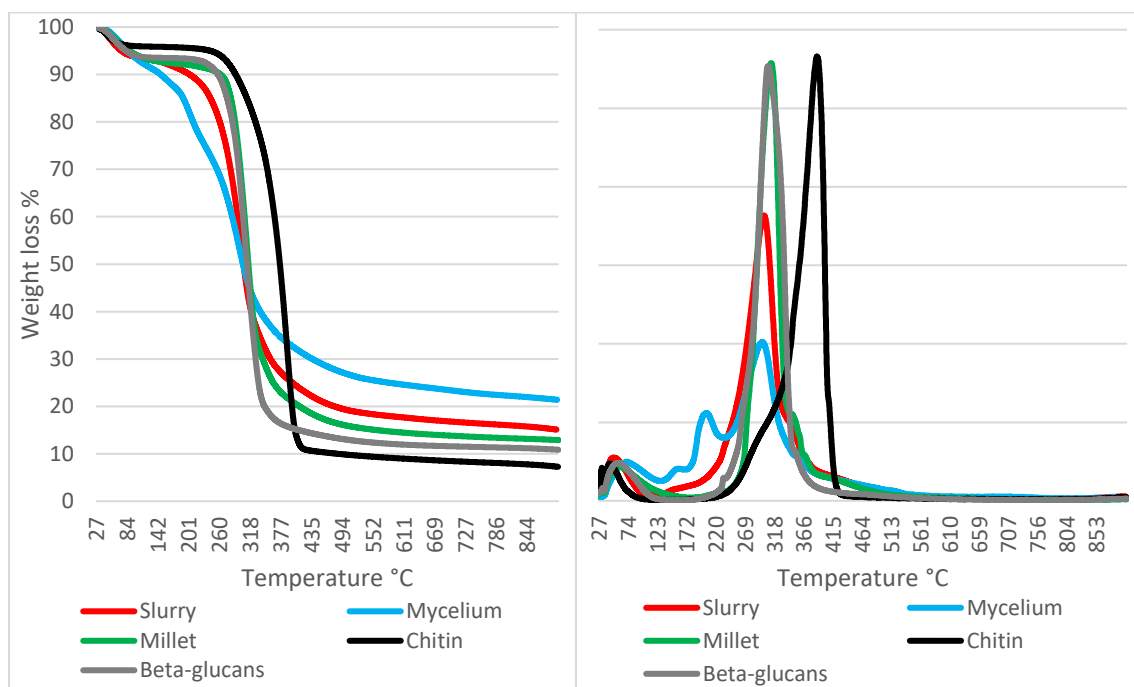

**Figure S17:** TGA (left) and DTGA (right) profiles of strain 17 (pure mycelium and slurry mat) compared to reference materials.

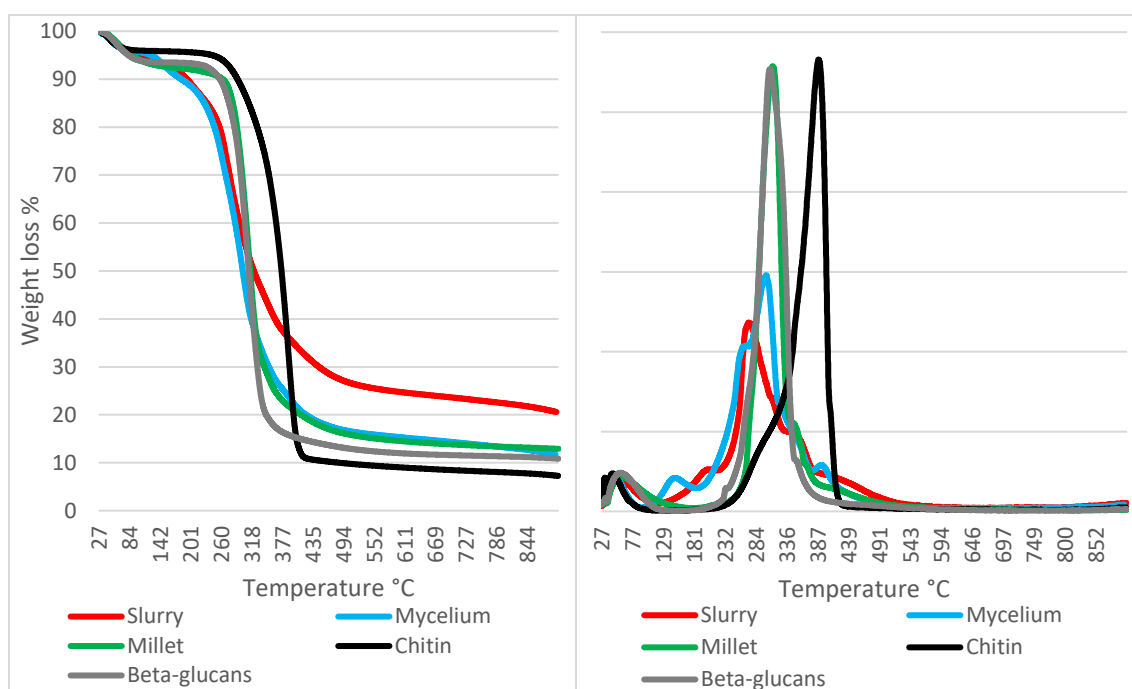

**Figure S18:** TGA (left) and DTGA (right) profiles of strain 18 (pure mycelium and slurry mat) compared to reference materials.

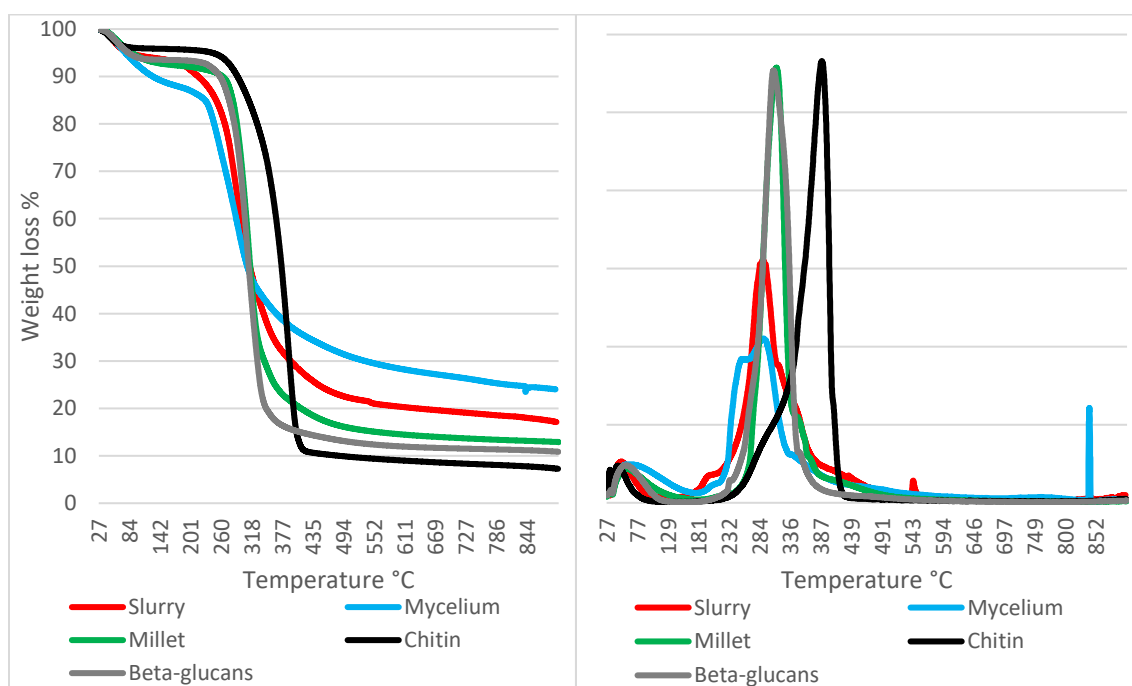

**Figure S19:** TGA (left) and DTGA (right) profiles of strain 19 (pure mycelium and slurry mat) compared to reference materials.

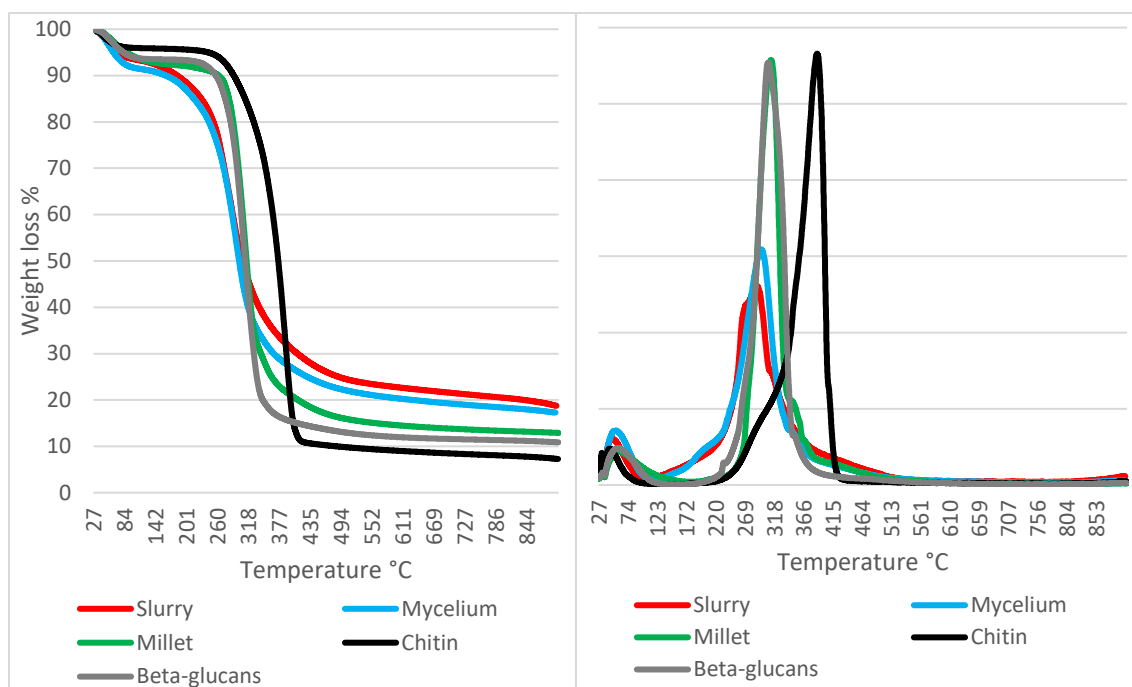

**Figure S20:** TGA (left) and DTGA (right) profiles of strain 20 (pure mycelium and slurry mat) compared to reference materials.

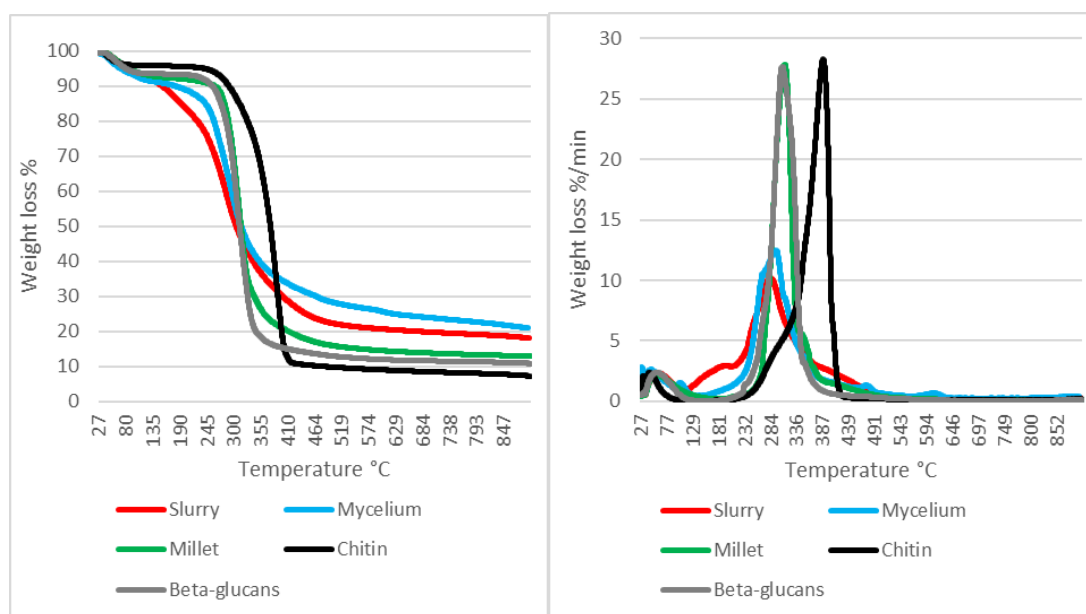

**Figure S21:** TGA (left) and DTGA (right) profiles of strain 21 (pure mycelium and slurry mat) compared to reference materials.

**Table S1:** ITS sequences of the strains and main parameters on Mycobank Molecular ID and NCBI.

| strain code in the paper | species                                      | MFSC code | ITS sequence                                                                                                                                                                                                                                                                                                                                                                                                                                                                                                                                                                                                                                                                                                                                 | Score   | Similarity |
|--------------------------|----------------------------------------------|-----------|----------------------------------------------------------------------------------------------------------------------------------------------------------------------------------------------------------------------------------------------------------------------------------------------------------------------------------------------------------------------------------------------------------------------------------------------------------------------------------------------------------------------------------------------------------------------------------------------------------------------------------------------------------------------------------------------------------------------------------------------|---------|------------|
| 1                        | <i>Abortiporus biennis</i> (Bull.) Singer    | 064-18    | TCTACCTGATTTGAGGTCAGATTTCAAGTATATAAGTTTGTCTGA<br>GTAAACAGACGGTTAGAAGCATGAACTATAAATTTTGTACAACA<br>TCTACAGCGCAGATAATTATCACACTGAAAAATGTGCAACACATT<br>CACACTAATACATTTTCAGAGGAGCTGATGTTGATTAACACCGG<br>CATACTCCAAGTCCAATTCTGACAACAAAAGTTGAGAGAATTGA<br>GAATACCATGACACTCAAACAGGCATGCTCCTCGGAATACCAAG<br>GAGCGCAAGGTGCGTTCAAAGATTTCGATGATTCACTGAATTCTG<br>CAATTCACATTACTTATCGCATTTTCGCTGCGTTCTTCATCGATGCG<br>AGAGCCAAGAGATCCGTTGCTGAAAGTTGTATTATTTAATTGCGT<br>TAAACGCGAGTATTACATTCTTTAAACTGAAGCGTATAAATGTGT<br>AAACCACAGACTTTAAATCTTCAATTGACTTTCGTCAAACTCGCG<br>GTGGCAAGCTCGAACGTCCATCAATAAGAAAAATAAAAAATCCA<br>TGTAAGTGCACAGAGGTGTAAAGAATTTGAAATAACCGAGGC<br>GTGCACATGCCTAATAAAAGGCCAGCAACAACCAAGGCATTA<br>AATTCAGTAATGATCCTTCCGCGAGGTTACCTACGGAAG | 1030.23 | 99.85%     |
| 2                        | <i>Bjerkandera adusta</i> (Willd.) P. Karst. | 101-19    | TGCGGAAGGATCATTATCGAGTTTTGAACGGGTTGTCTGCTGGCT<br>CGCAAGGGCATGTGCACGCCTGTCTCATCCACTCTAACTTCTGTG<br>CACTTTTCATAGGCCGGCTTGTGGGTGCGTTCGCGCACTTGTAGG<br>TGTCGGGCTTATGCTTTATTACAAACGATTCAGTTTTAGAATGTCA<br>TACTTTGCTATAACGCAATTTATATACAACCTTCAGCAACGGATCT<br>CTTGGCTCTCGCATCGATGAAGAACGCAGCGAAATGCGATAAGT<br>AATGTGAATTGCAGAATTCAGTGAATCATCGAATCTTTGAACGCA<br>CCTTGCGCTCCTTGGTATTCCGAGGAGCATGCCTGTTTGAGTCTC<br>ATGGAATTCTCAACCTTCGGCTTCATTGACGAAGGCTTGACTTG<br>GAGGTCGTGCCGGCTCTCGTAGTCGGCTCCTCTGAAATGCATTAG<br>TGCGAACGTTACCGACCGCTTCAGCGTGATAATTATCTGCGTTGC<br>TGTGGAGGGTATTCTAGTGTTACGCTTCTAACCCTCTTCGGACA<br>AATTTCTGAACTCTGAGCTCAAATCAGTAGGACTACCCGCTGAAC<br>TTAAGCATATCAT                                                                    | 905.01  | 99.67%     |
| 3                        | <i>Coriolopsis gallica</i> (Fr.) Ryvarden    | 086-19    | GACGGGTTGTACTGGCTCTCCGAGGGCCTGTGCACCCCTGCTCAT<br>CCACTCTACACCTGTGCACTACTGTGGGTATCGGAGGGCGTCCA<br>GTCGTTTGCGGCGAGGCGTTAACCGTGCCTACGTCTTATTACAAA<br>CGCTTCAGTATCAGAATGTGTATTGCGATGTAACGCATCTATATA<br>CACTTTTCAGCAACGGATCTCTTGGCTCTCGCATCGATGAAGAAC<br>GCAGCGAAATGCGATAAGTAATGTGAATTGCAGAATTCAGTGAA<br>TCATCGAATCTTTGAACGCACCTTGCCTCCTTGGTATTCCGAGG<br>AGCATGCCTGTTTGAGTGTCATGAAATCTCAAACCCATAAGTCT<br>TTGCGGGCTTACGGGCTTTGGACTTGGAGGCTTTGTGCGCGACC<br>GCGAGGTCTGTGACTCCTCTCAAATGCATTAGCTTGATTCTTG<br>CGGATCGGCTCTCGGTGTGATAATTGTCTACGCCGTGACCGTGA<br>AGCGTTTTGGCGAGCTTCTAATCGTCTCTTACGAGACAGTTTACA<br>TTGACCTCTGACCTCAAATCAGGTAAGACTACCCGCTGAACTTAA<br>CCATATCAATAAGCGGAGGAA                                                                   | 843.20  | 98.27%     |

|   |                                               |        |                                                                                                                                                                                                                                                                                                                                                                                                                                                                                                                                                                                                                                                                                                                                                                                                                                                                                                                                                                                                                                                                                                                                                                                                                                                                                                                                                                                                                                                                                                                                                                                    |        |        |
|---|-----------------------------------------------|--------|------------------------------------------------------------------------------------------------------------------------------------------------------------------------------------------------------------------------------------------------------------------------------------------------------------------------------------------------------------------------------------------------------------------------------------------------------------------------------------------------------------------------------------------------------------------------------------------------------------------------------------------------------------------------------------------------------------------------------------------------------------------------------------------------------------------------------------------------------------------------------------------------------------------------------------------------------------------------------------------------------------------------------------------------------------------------------------------------------------------------------------------------------------------------------------------------------------------------------------------------------------------------------------------------------------------------------------------------------------------------------------------------------------------------------------------------------------------------------------------------------------------------------------------------------------------------------------|--------|--------|
| 4 | <i>Coriolopsis gallica</i> (Fr.)<br>Ryvarden  | 121-19 | GACGGGTTGTAGCTGGCCTTTCCGGAGGCCTGTGCACGCTCTGC<br>TCATCCACTCTACACCTGTGCACTTACTGTGGGTATCGGAAGGCG<br>TCGAGTCGTTTGCGGCGAGGCGTTAACCGTGCCTACGTCTTATTA<br>CAAACGCTTCAGTATCAGAATGTGTATTGCGATGTAACGCATCTA<br>TATACAACTTTTCAGCAACGGATCTCTTGGCTCTCGCATCGATGAA<br>GCCCCGAGCGAAATGCGACAAGTAATGTGAATTGCAGAATTCAG<br>TGAATCATCGAATCTTTGAACGCACCTTGCCTCCTTGGTATTCCG<br>AGGAGCATGCCTGTTTGTAGTGTATGAAATTCTCAAACCCATAAG<br>TCTCCGCGGGCTTACGGGCTTTGGACTTGGAGGCTTTGTGCGCG<br>ACCGCGAGGTCACGTCGACTCCTCTCAAATGCATTAGCTTGATTC<br>CTTGCGGATCGGCTCTCGGTGTGATAATTGTCTACGCCGTGACCG<br>TGAAGCGTTTTGGCGAGCTTCTAATCGTCTCTTACGAGACAGTTT<br>ACATTGACCTCTGACCTCAAACGGAGGCA                                                                                                                                                                                                                                                                                                                                                                                                                                                                                                                                                                                                                                                                                                                                                                                                                                                                                                                                            | 827.35 | 97.85% |
| 5 | <i>Coriolopsis trogii</i> (Berk.)<br>Domanski | 027-18 | GCCTTCCAAGTTCCAAAGCCCCTAAGCCCGCAAAGACTTATGTTT<br>AGAATTTTCATGACACTCAAACCGGCATGCTCCTGGAAATACCCA<br>AGAGCGCAAGGGTTTCAAAGATTGGATGATTCCACTGAATTCTG<br>CAATTCACATTACTTATCGCATTTCTGGTTTCTTCATTGATGGAG<br>AGCCAAGAGATTCCGTGCGAAAAGTTGTATATAGATGCGTTACAT<br>CGCAATACACATTTTGTAGTGAATCGTTTGTAGTAAACGTAGG<br>CACGTTAACGCCTCGCCGTAAACGACGCGACACCTCCCGATACCC<br>ACAGTAAGTGACAGGTGTAGAGTGATGAGCAGGCGTGCACAT<br>GCCTCCGGAGAAGCCAGCTACAACCCATTTCAAACCTCGATAATG<br>ATCCTTCTTCCGTAGGTGAACCTGCGGAAGGATCATTATCGAGTT<br>TTGAAATGGGTTGTAGCTGGCTTCTCCGGAGGCATGTGCACGCC<br>CTGCTCATCCACTCTACACCTGTGCACTTACTGTGGGTATCGGGA<br>GGTGTGCGTCGTTTACGGCGAGGCGTTAACCGTGCCTACGTTTT<br>ACTACAAACGATTTCAGTATCAGAATGTGTATTGCGATGTAACGCA<br>TCTATATACAACTTTTCAGCAACGGATCTCTTGGCTCTCGCATCGAT<br>GAAGAACGCAGCGAAATGCGATAAGTAATGTGAATTGCAGAATT<br>CAGTGAATCATCGAATCTTTGAACGCACCTTGCCTCCTTGGTAT<br>TCCGAGGAGCATGCCTGTTTGTAGTGTATGAAATTCTCAAACCCA<br>TAAGTCTTTGCGGGCTTACGGGCTTTGGACTTGGAGGCTTGTCTG<br>GCGACCGTGAGGTCACATCGACTCCTCTCAAATGCATTAGCTTGA<br>TTCCTTGCGGATCGGCTCTCGGTGTGATAATTGTCTACGCCGTGA<br>CCGTGAAGCGTTTTGGCAAGCTTCTAACCGTCTCTAACGAGACAG<br>CTTACTTTGACCTCTGACCTCAAATCAGGTAGACTCCCCAGAACT<br>TATGCATATGGTTAACCGGCGGAAAGGAACATTATCGAGTTTTG<br>AAATGGGTTGTAGCTGGCTTCTCCGGAGGCATGTGCACGCCTGC<br>TCATCCACTCTACACCTGTGCACTTACTGTGGGTATCGGGGAGGT<br>GTCGCGTCGTTTAGGCGAGGCGTTAACGTGCCTACGTTTTACTAC<br>AAACGATTCATTATCAAAATGTGTATTGCGATGTAACGCTCTATA<br>TACACTTTAGCAACGGATCTCTTGGCTCTCCATCGATGAAGAAAC<br>GCACCGAAATGCGATAAGTTAATGTGGAATTGCAGAAATTCATT<br>GAAATCATCAAATCTTTGAACCCCTTGCCCTCTTGGGTATTCCAG<br>GGAGCATGCCGTT | 965.24 | 95.33% |

|   |                                                                                              |        |                                                                                                                                                                                                                                                                                                                                                                                                                                                                                                                                                                                                                                                                                                                                                                                                                                                                                                                                                                                                                                                                                                                                                                                                                                                                     |        |        |
|---|----------------------------------------------------------------------------------------------|--------|---------------------------------------------------------------------------------------------------------------------------------------------------------------------------------------------------------------------------------------------------------------------------------------------------------------------------------------------------------------------------------------------------------------------------------------------------------------------------------------------------------------------------------------------------------------------------------------------------------------------------------------------------------------------------------------------------------------------------------------------------------------------------------------------------------------------------------------------------------------------------------------------------------------------------------------------------------------------------------------------------------------------------------------------------------------------------------------------------------------------------------------------------------------------------------------------------------------------------------------------------------------------|--------|--------|
| 6 | <i>Daedaleopsis<br/>confragosa</i><br>(Bolton) J.<br>Schröt.                                 | 155-19 | CTGCGGAAGGATCATTAACGAGTTTTGAGGGGTTGTAGCTGGCC<br>TTCCGAGGCATGTGCACGCCCTGCTATTCCACTCTACACCTGTG<br>CACTTACTGTGGGTCTCAGGCGAGCGTCGGTCGCTTCGCGGCGT<br>CGTCGTTCAACTGGGCTCACGTTTTACTACAACTATTAAGTATC<br>AGAATGTCTACTGCGAATTAACGCATTTAAATACAACTTTCAGCA<br>ACGGATCTCTTGGCTCTCGCATCGATGAAGAACGCAGCGAAATG<br>CGATAAGTAATGTGAATTGCAGAATTCAGTGAATCATCGAATCTT<br>TGAACGCACCTTGCCTCCTTGGTATTCCGAGGAGCATGCCTGTT<br>TGAGTGTGATGAAATTCTCAACCTAACGAGTCTTTCGGGCTCGG<br>TAGGCTTGGACTTGGAGGTTCTTGTGCGCCTAACGGTCGGCTCCT<br>CTTAAATGCATTAGCTCGGTTCTTTCGGGATCGGCTCACGGTGTG<br>ATAATTGTCTACGCCGCGACCGTTGAAGCGTTTTGGCCGGCTTCT<br>AATCGTCTCGTTGGAGACACTACTCTTATGACCTTCTGACCTCAA<br>ATCAGGTAGGACACCGCTGAACCTAAGCATATCAATAAGCCGGA<br>AGGAGATCATTAACGAGTTTTGAAAGGGGTTGTAGCTGGCCTTC<br>CGAGGCATGTGCAGCCTGCTCACTCACTCTACACCTGTGCACTTA<br>CGTGGGTCTCAGGCGAGCGTCGGTCGCTTCGGGCGTCGTCGTTT<br>ACTGGGCTCCGTTTTACTACAACTATTAAGTATCAGAATGTCT<br>ACGCGAATTAAGCACTTAAATAAACTTTCGCAACGGATCTCTTGG<br>CTCTGCATCGATTAAGAAGCACGAAATGCGATAAGTAATGTGAA<br>TTGCACAATTCGTGGAATCTCGAACTTTGAACACCTTGCCTCTT<br>GGGTATTCCAGGGAGCAGCTGTTTTGAGTGTGAGGAAATTCAA<br>CTAACAGGTCTTTCGGGCTCGGTAGGCTTGGGACTTGAAGGT<br>TCTTGTTGCGCTAACGGTGGCTCTCTTAAATGCATTAACCTCGGTT<br>CTTGCGGAATGGCCCGGGTTGGATAATTGTTCTCCCCCGCCT<br>TTAAACCCTTTTGGC | 920.86 | 92.54% |
| 7 | <i>Daedaleopsis<br/>confragosa</i> var.<br><i>tricolor</i> (Bull.)<br>Bondartsev &<br>Singer | 148-19 | GCGGAAGGATCATTAACGAGTTTTGAGGGGTTGTAGCTGGCCTT<br>CCGAGGCATGTGCACGCCCTGCTATTCCACTCTACACCTGTGCA<br>CTTACTGTGGGTCTCAGGCGAGCGTCGGTCGCTTCGCGGCGTCTG<br>TCGTTCAACTGGGCTCACGTTTTACTACAACTATTAAGTATCA<br>GAATGTCTACTGCGAATTAACGCATTTAAATACAACTTTCAGCAA<br>CGGATCTCTTGGCTCTCGCATCGATGAAGAACGCAGCGAAATGC<br>GATAAGTAATGTGAATTGCAGAATTCAGTGAATCATCGAATCTTT<br>GAACGCACCTTGCCTCCTTGGTATTCCGAGGAGCATGCCTGTTT<br>GAGTGTGATGAAATTCTCAACCTAACGAGTCTTTCGGGCTCGGT<br>AGGCTTGGACTTGGAGGTTCTTGTGCGCCTAACGGTCGGCTCCTC<br>TTAAATGCATTAGCTCGGTTCTTTCGGGATCGGCTCACGGTGTGA<br>TAATTGTCTACGCCGCGACCGTTGAAGCGTTTTGGCCGGCTTCTA<br>ATCGTCTCGTTGGAGACACTACTCTTATGACCTTCTGACCTCAAA<br>TCAGGTAGGACTACCGCTGAACCTAAGCAT                                                                                                                                                                                                                                                                                                                                                                                                                                                                                                                                                                                | 935.13 | 100%   |
| 8 | <i>Fomes<br/>fomentarius</i> (L.)<br>Fr.                                                     | 179-19 | GCGGAAGGATCATTAACGAGTTTGCTGGGTTGTAGCTGGCCTTC<br>CGAGGCATGTGCACGCCCTGCTCATCCACTCTACACCTGTGCACT<br>TACTGTGGGATTTCAAGTGCGTCGCTTTCGGGCGGCGTCACTCG<br>GCCACGTTTTCTTTACAACTATCGAAGTAACAGAATGTTTATTG<br>ATGTAACGCATCTATAATAAACTTTCAGCAACGGATCTCTTGGC<br>TCTCGCATCGATGAAGAACGCAGCGAAATGCGATAAGTAATGTG<br>AATTGCAGAATTCAGTGAATCATCGAATCTTTGAACGCACCTTGC<br>GCTCCTTGGTATTCCGAGGAGCATGCCTGTTTGAGTGTGATGAAA<br>TTCTCAACCTATAAACTTTTGTGGGTTTGTAGGGTTGGCTATTGG<br>AGGCTTTTGTGGCCCTCGTTTGAGTCAGCTCCTCTCAAATGCATT<br>AGCTTGGTTCCTTTCGGATCGGCTGTGCGGTGTGATAATGTCTACG<br>CCGCGACCGTGAAGCGTTTGGAGAGCTTCTAATGGTCTCGTCAG<br>AGACAGCTTTTATGAACCTGACCTCAAATCAGGTAGACACCCGC<br>TGAACCTAAGCATAT                                                                                                                                                                                                                                                                                                                                                                                                                                                                                                                                                                                              | 866.97 | 99.64% |

|    |                                              |        |                                                                                                                                                                                                                                                                                                                                                                                                                                                                                                                                                                                                                                                                                                                                                                                                                                                                                                                                                                                                                                                                                                                                                                                                                                                                                                                                                                                                                                                                                                                                                                                                                                                                             |         |        |
|----|----------------------------------------------|--------|-----------------------------------------------------------------------------------------------------------------------------------------------------------------------------------------------------------------------------------------------------------------------------------------------------------------------------------------------------------------------------------------------------------------------------------------------------------------------------------------------------------------------------------------------------------------------------------------------------------------------------------------------------------------------------------------------------------------------------------------------------------------------------------------------------------------------------------------------------------------------------------------------------------------------------------------------------------------------------------------------------------------------------------------------------------------------------------------------------------------------------------------------------------------------------------------------------------------------------------------------------------------------------------------------------------------------------------------------------------------------------------------------------------------------------------------------------------------------------------------------------------------------------------------------------------------------------------------------------------------------------------------------------------------------------|---------|--------|
| 9  | <i>Fomitiporia mediterranea</i><br>M. Fisch. | 079-18 | TTTTTGTGTTGGGAGGGCCCCAACGTCTCCCGTGTGATAGAGGT<br>GAAATTATTGTTATTTTCTCCACGGAGGCCCTTTACACTTTCCC<br>GAGACCCAGCAAAGTGTGTGTTATATATGTTAAAGTTCCAAGGG<br>TGTTCCCGGTATTTGTGTGGTGCCCCGGTTTTTTTTTTTATTCT<br>TATTTGCGGGAGAGAGGTTCCCCCGCTTTCTCCCGTTGGATTGC<br>CTATGGGCCGGCCCCACTATACTATTACCAACTTTGATAATGTG<br>CACCGGGGGTGTGGTTGATGAGTGTGAAGGCGAGCACATGTCC<br>CCATATTTGCACCAGCCTCCAACCTCCACTTTCCAATTCGTTTTGT<br>TCCCTTCCTTCCGTAGGGGTGACCTGCGGAAGGATCATTAACGA<br>GTTGGAACGTGGAGGTTGATGCTGGTGCATATATAGTGACATG<br>TGCTCGCCTTCACACTCTTCATCCACTCAACCCCTGTGCACTTATC<br>AGAGTTAGTAATAGTATTGTGGTGGCAGCCGTTTGTTATTCATTG<br>TTAGAAGCGGGGTAACCTTTCTAGCAGTAGTAATAAACAATC<br>TTGGTTCTACTACTATTACTGTGAACACTTTGACTTTTACTTATACA<br>AACACTTTGCTTGTTCTGTGAATGTGAATGCTCCTGTGAGCG<br>AAATACAAATATACAACCTTTCAACAACGGATCTCTGGCTCTCGC<br>ATCGATGAAGAACGCAGCGAAATGCGATAAGTAATGTGAATTGC<br>AGAATTCAGTGAATCATCGAATCTTTGAACGCACCTTGCGCCCT<br>TGGTATTCGAGGGGCATGCCTGTTTGAGTGTGATGTAATTCTCA<br>ATCCTCTTTTTCTTAATTGAAGGAGGGGGCTTGACTTGAGGT<br>TAATATACATGCTGGTACTGTCTGTATCGGCTCCTCTAAAATGC<br>ATTAGCTGGACTGTAGTTCGATTGTTTGGTGTAGTAATAGTTTT<br>CTATCTATATTCACTACAGTGCTTGCTTAGACTGTCTGCTCTAAT<br>AGTCCGCTATATGTCGGACAGGTAATCTGTTACCTTAAACCATTT<br>GACTCCTTTGACCTCAAATCAGGAGGACTACCCGCTGAACCTAAG<br>CATATCAATAAGGCCGGAGGAAGGATCATTAAACCGAGTTGGAAC<br>GTGGAGGTTGATGCTGGTGCATATATAGTGATCATGTGCTCGCT<br>TCACACTCTTCATCCACAACCCCTGTGCACTTTATCAGAGTTAGTA<br>ATAGTATTGTGGTGGCAGCCGTTTGTTATTCATTGTTTGAAGCG<br>GGGGTAACCTTTTTCTAGCAGTAGTAAATATAAAACAATCTTGGT<br>TCTACTAACAAATAACGTGGAAACCCCTTGAACTTTACTTTACACAA<br>ACCTTTGCTTGTCTTGAAAAAGGGAAAAAGGCCCGGGGAGGC<br>AAGAATACAAAATATCAACTTTTAAACACGGGGACTTCTGGGGCT<br>TCCCACAGAAAAAGAAA | 1161.78 | 93.64% |
| 10 | <i>Fomitopsis iberica</i> Melo &<br>Ryvarden | 104-19 | CTCTCCGCTTATTGATATGCTTAAGTTCAGCGGGTAATCTACCTGA<br>TTTGAGGTCAAGGTCAAAGTCATTGTCCAGTAAAGGACGATTGG<br>AAGCCGAGCCCATTTGATATGCTTCACTGCAACGGCGTAGACAATT<br>ATCACACCGATAGCTGATCCGCAAAGGTTGAGCTAATGCATTCA<br>AGAGGAGCCGATCACAAGTACCAGCAATAAACCTCCAAATCCAA<br>GCTCTATTCACAAAAGCAAATAGAGTTGAGAATTCATGACACTC<br>AAACAGGCATGCTCCTCGGAATACCAAGGAGCGCAAGGTGCGTT<br>CAAAGATTCGATGATTCACTGAATTCTGCAATTCACATTACTTATC<br>GCATTTGCTGCGTTCTTCATCGATGCGAGAGCCAAGAGATCCGT<br>TGCTGAAAGTTGTATTTAAATGCGTTAGACGCAAGAGTACATTCT<br>TTAAACTGAAGTAGTTTGTGATGATACATAGGAGGGCCTCCAAC<br>CAGAGCAAAGTCAATGAAGACCGTAGCTCCGATCACAAGCCAAC<br>CTACAGTGTGTGCACAGGTGTGTGAGATGGATAGTGATCAGGGC<br>GTGCACATGCCGCCCCAAAGAGACGGCCAGCTACAACCCCTTTC<br>AAAATTCATTAATGATCCTTCCGCAGGTTACCTACGGAAG                                                                                                                                                                                                                                                                                                                                                                                                                                                                                                                                                                                                                                                                                                                                                                                                                                                                                                                             | 930.37  | 99.83% |

|    |                                             |        |                                                                                                                                                                                                                                                                                                                                                                                                                                                                                                                                                                                                                                                                                                                                                                                                                                                                                                                                                                                                                                                                                                              |        |        |
|----|---------------------------------------------|--------|--------------------------------------------------------------------------------------------------------------------------------------------------------------------------------------------------------------------------------------------------------------------------------------------------------------------------------------------------------------------------------------------------------------------------------------------------------------------------------------------------------------------------------------------------------------------------------------------------------------------------------------------------------------------------------------------------------------------------------------------------------------------------------------------------------------------------------------------------------------------------------------------------------------------------------------------------------------------------------------------------------------------------------------------------------------------------------------------------------------|--------|--------|
| 11 | <i>Fomitopsis pinicola</i> (Sw.) P. Karst.  | 117-19 | <p>GTCAAAGTTATTGTCCCGTGAAGGACGATTGGAAGCCGAATAAT<br/> ATGCTTCACAGTAACGGCGTAGACATTTTATCACACCGATAAGCT<br/> GATCCACAAAAGGTTTCGAGCTAATGCATTCAAGAGGAGCCGATC<br/> ACAGGTACCGGCAATAAACCTCCAAGTCCAAGCTCTATTACAAA<br/> AGCAAATAGAGTTGAGAATTCCATGACACTCAAACAGGCATGCT<br/> CCTCGGAATACCAAGGAGCGCAAGGTGCGTTCAAAGATTTCGATG<br/> ATTCACTGAATTCTGCAATTCACATTACTTATCGCATTTTCGCTGCG<br/> TTCTTCATCGATGCGAGAGCCAAGAGATCCGTTGCTGAAAGTTGT<br/> ATTTAAATGCGTTAGACGCAAGAGGACATTCTTTTAACTGAAGTA<br/> GTGTGTGATAAAACATAGGAAGGCCCACTAAAAAGCAGAGTC<br/> GATGAAGACCCCACTCCAATCATAAGCCGACCTACAGTATGTGCA<br/> CAGGTGTGTGAGATGGATAATGATCAGGGCGTGACATGCCGCT<br/> CAAACGAAACAGCCAGCTACAACCCCTTTCAGAATTCATTAATGA<br/> TCCTTCCGCAGGTTACCTACGG</p>                                                                                                                                                                                                                                                                                                                                                                                               | 946.22 | 99.83% |
| 12 | <i>Ganoderma carnosum</i> Pat.              | 161-19 | <p>CCCTAGGTGAACCTGCGGAAGGATCATTATCGAGTTCTGACTGG<br/> GTTGTAGCTGGCCTTCCGAGGCACGTGCACGCCCTGCTCATCCAC<br/> TCTACACCTGTGCACTTACTGTGGGTTTCAGATCTGTGAAGCGTG<br/> CTCCTTGCGGGGCTTCGTGAAGCGCGTCTGTGCCTGCGTTTATCA<br/> CAAACCTATAAAGTATTAGAATGTGTATTGCGATGTAACGCATC<br/> TATATACAACTTTTCAGCAACGGATCTCTTGGCTCTCGCATCGATG<br/> AAGAACGCAGCGAAATGCGATAAGTAATGTGAATTGCAGAATTC<br/> AGTGAATCATCGAATCTTTGAACGCACCTTGCGCTCCTTGGTATT<br/> CCGAGGAGCATGCCTGTTTGAGTGTGATGAAATCTTCAACCTACA<br/> AGCCTTTGCGGTTTGTAGGCTTGGACTTGGAGGCTTGTGCGCCCT<br/> TTGTCGGTTCGGCTCCTCTTAAATGCATTAGCTTGATTCTTGC<br/> TCGGCTCTCGGTGTGATAATGTCTACGCCGCGACCGTGAAGCGTT<br/> TGGCGAGCTTCTAACCGTCTTCGCTTGAAGACAGCTTTATGACCT<br/> CTGACCTCAAATCAGGTAGACTACCCGCTGAACCTAAGCATATCA<br/> ATAAGCGGAG</p>                                                                                                                                                                                                                                                                                                                                                      | 979.51 | 99.69% |
| 13 | <i>Ganoderma lucidum</i> (Curtis) P. Karst. | 137-19 | <p>GACCTGCGGAAGGATCATTTTGAGTTCTGACTGGGTTGTAGCTG<br/> GCCTTCCGAGGCACGTGCACGCCCTGCTCATCCACTCTACACCTG<br/> TGCACTTACTGTGGGTTTCAGATCTGTGAAGCGTGCCCTTGC<br/> GGCTTCGTGAAGCGCGTCTGTGCCTGCGTTTATCACAACTCTAT<br/> AAAGTATTAGAATGTGTATTGCGATGTAACGCATCTATATACAAC<br/> TTTCAGCAACGGATCTCTTGGCTCTCGCATCGATGAAGAACGCAG<br/> CGAAATGCGATAAGTAATGTGAATTGCAGAATTCAGTGAATCAT<br/> CGAATCTTTGAACGCACCTTGCGCTCCTTGGTATTCCGAGGAGCA<br/> TGCCTGTTTGAGTGTGATGAAATCTTCAACCTACAAGCCTTTGCG<br/> GTTTGTAGGCTTGGACTTGGAGGCTTGTGCGCCCTTTGTGCGTCTG<br/> GCTCCTCTTAAATGCATTAGCTTGATTCTTGCAGGATCGGCTCTCG<br/> GTGTGATAATGTCTAGCCGCGACCGTGAAGCGTTTGGCGAGCTT<br/> CTAACCGTCTTCGCTTGAAGACAGCTTTATGACCTCTGACCTCAA<br/> ATCAGGTAGACTACCCGCTGAACCTAAGCATATCAATAAGCGGA<br/> AGGAAAAAATCGAGTTCTGACTGGGTTGTAGCTGGCCTTCCGA<br/> GGCACGTGCACGCCTGCTCATCACTCTACACCTGTGCACTTACTG<br/> TGGGTTTCAGATCTGTGAAGCGTGCCCTTGC<br/> GGGGCTTCTGGA<br/> AGCCGTCGTGCTGCGTTTATCCAGACTCTATAAAGTATTAGAATG<br/> TGTATTGCGATGTAACGCATCTATATACAACCTTTCACACGAAGCT<br/> TTGGGCTCTCATCGGATAAAGAAAGCACCCAAATGCGATAAGGT<br/> AATGTGAAATTGCAGAAATTCAGTGGAATCATCAAATCTTTGAAA</p> | 860.64 | 97.79% |



|    |                                                        |        |                                                                                                                                                                                                                                                                                                                                                                                                                                                                                                                                                                                                                                                                                                                                                                                                                                                                                                                                                                                                                                                                                                                                                                                                                                                                                                                                                                                                                                                                                                                                                                                                                                                                                                                                                |        |        |
|----|--------------------------------------------------------|--------|------------------------------------------------------------------------------------------------------------------------------------------------------------------------------------------------------------------------------------------------------------------------------------------------------------------------------------------------------------------------------------------------------------------------------------------------------------------------------------------------------------------------------------------------------------------------------------------------------------------------------------------------------------------------------------------------------------------------------------------------------------------------------------------------------------------------------------------------------------------------------------------------------------------------------------------------------------------------------------------------------------------------------------------------------------------------------------------------------------------------------------------------------------------------------------------------------------------------------------------------------------------------------------------------------------------------------------------------------------------------------------------------------------------------------------------------------------------------------------------------------------------------------------------------------------------------------------------------------------------------------------------------------------------------------------------------------------------------------------------------|--------|--------|
| 14 | <i>Irpex lacteus</i><br>(Fr.) Fr.                      | 076-18 | TCCAAGTTCCAAGCCCCGGTTAAACCTTTCATTAACAAAAATTTTA<br>GGTGAGAATACCCCTGAGACTTCAAAACCGGCATATTTCTTGGA<br>ATACCCAGGAGGCCAGGGTTACAAAGTTTTGATGATTCCACTGA<br>ATTTCTGCAATTCCACATTACTTTATCGCATTTTCGTGCGTTTTAAT<br>CGATGCAGAGCCCAAAGTTCGGTTGTAAAGTTGTATATAAAATGT<br>GTTATACCCCGTTGACTTTTCTATAAATGAAGCTTGGTAGTAAAA<br>CATAAGAAAGAAAAAAGGCTTGTTCAACCGAAGACCTCTCGGAG<br>TTCCTGGAAGCTTTCACCATTTTTTTCTTCTTACATAAAGTGCAC<br>AGAGGTTAAGAGGGTTGACCCGGCGTGACATGCCCCGTGAGA<br>GGCCAGCTACAACCCGTTCAAACTCGATAATTAACCTTCTTTCC<br>GTAGGGGTGACTGCGGAAGGATCATTATCGAGTTTTGAACGGGT<br>TGAGCTGGCCTCTCACGGGGCATGTGCACGCCTGGCTCATCCAC<br>TCTTAACCTCTGTGCACTTTATGTAAGAGAAAAAATGGTGGAAG<br>CTTCCAGGATCTCGCGAGAGGTCTTCGGTTGAACAAGCCGTTTTT<br>CTTTCTTATGTTTTACTACAAACGCTTCAGTTATAGAATGTCAACT<br>GTGTATAACACATTTATATACAACCTTTCAGCAACGGATCTCTTG<br>CTCTCGCATCGATGAAGAACGCAGCGAAATGCGATAAGTAATGT<br>GAATTGCAGAATTCAGTGAATCATCGAATCTTTGAACGCACCTTG<br>CACTCCTTGGTATTCCGAGGAGTATGCCTGTTTGAGTCTCATGGT<br>ATTCTCAACCCCTAAATTTTTGTAAATGAAGGTTTAGCGGGCTTGG<br>ACTTGGAGGTTGTGTCGGCCCTTGTGCGTCACTCCTCTGAAATG<br>CATTAGCGTGAATCTTACGGATCGCCTTCAGTGTGATAATTATCT<br>GCGCTGTGGTGTGAAGTATTTATGGTGTTTCATGCTTCGAACCGT<br>CTCCTTGCCGAGACAATCATTTGACAATCTGAGCTCAAATCAGGT<br>AGGACCTACCCGCTGAACCTAAGCATATCAATAAGCCGGAGGAA<br>AAGGAAATTATCGAGTTTTGAACGGGTTGTAGCTGGCCTCTCAC<br>GGGGCATGTGCACGCCGGCTCATCACTCTTAACCTCTGTGCACTT<br>TATGTAAGAGAAAAAATGGTGGAAGCTTCAGAATCTCCGAG<br>AAGGTCTTTGGTTGAACAAGCCTTTTTCTTCTTATGTTTTACTAC<br>AAACGCTTCATTTATAGAAAGGTCAACGTGGTATAACCATTTTAT<br>ATACACTTTCACACGGATCTCTGGGCTCTGCATCAATAAAGAAAC<br>CACCCAAATGCGATAAGTAATGTGAAATTGCAGAAATTCATTGG<br>AATCATCAAAACTTTGAACCTTGCATCCTGGGTATTCCAGGAAGT<br>ATGCTGGTTTGAGTCTCAGGGGTATTCTACCAAATTTTGTTAAT<br>GAAAGGTTTAACGGGCCTTGGAACTTG | 993.77 | 91.89% |
| 15 | <i>Irpiciporus pachyodon</i><br>(Pers.) Kotl. & Pouzar | 175-19 | CCGTACGTGAACCTGCGGAAGGATCATTATGAATTTTATGAAGG<br>TTGTAGCTGGCCTCAATCGGGGCATGTGCACGCCTTGCTCATTCC<br>AACCTTTACACCTCTGTGCACTTTACATAGGCTTGGTTTGGGCTG<br>TCCTTTATTGGATGGCTGGCCGGCCTATGCATCTTACAAACGCTT<br>CAGTTTTAGAATGTCATCTGCGTATAACGCAACTATATACAACCTT<br>CAGCAACGGATCTCTGGCTCTCGCATCGATGAAGAACGCAGCG<br>AAATGCGATAAGTAATGTGAATTGCAGAATTCAGTGAATCATCG<br>AATCTTTGAATGCACCTTGCCTCCCGGTATTCCGGGAGGCATG<br>CCTGTTTGAGTGTGATGGTATTCTCAATACCCTAAATCTTTCGCGA<br>TGAGGGTGATTGGACTTGGAGGTTTTCTTGTGCTGGCTTCATTG<br>TCGGCTCCTCTGAAATACATTAGTGCAGATATTGCTGTTACTCTTC<br>AGTGTGATAAATTGTCTACGCTGCAGATGTATGGTGAATTGAAGTC<br>TGTGCTTCTAATTGTCTTGGACAATTTTGAATTCGACCTCAAA<br>TCAGGCAGGACTACCCGCTGAACCTAAGCATATCAATAAGCCGG<br>AAAGAATCAATAATGAATTTTATGACAGGGTTGTAGCTGGCCTCA<br>ATCGGGGCATGTGCACCCTGCTCATTCCACCTTTTACCCTCTGTGC<br>ACTTTACATAGGCCTGGTTTGGGCTGTCTTTATTGGATGGCTGG<br>CCGGCTATGCATCTTAAACGCTTCATTTTAGAATGTCATCTGCT<br>TATAAGCACTATATCCACTTTGCAACGGAACCTCTGGGCTCTGCA<br>TCCATAAAAAAGCACCGAAATGCGATAAGTAATGTGAAATTGCA<br>GAAATTCCTGAAATCTCAAACCTTTAATGCCTGGCGCTCGGTATT<br>CGGGAGGCAGG                                                                                                                                                                                                                                                                                                                                                                                                                                                                                                                                                                                                                                                                       | 886.55 | 97.28% |

|    |                                                                 |        |                                                                                                                                                                                                                                                                                                                                                                                                                                                                                                                                                                                                                                                                                                                                                                                                                                                                                                                                                                                                                                                                                                                                                                                                                                                                                                                                                                                                                                                                                                                                          |        |        |
|----|-----------------------------------------------------------------|--------|------------------------------------------------------------------------------------------------------------------------------------------------------------------------------------------------------------------------------------------------------------------------------------------------------------------------------------------------------------------------------------------------------------------------------------------------------------------------------------------------------------------------------------------------------------------------------------------------------------------------------------------------------------------------------------------------------------------------------------------------------------------------------------------------------------------------------------------------------------------------------------------------------------------------------------------------------------------------------------------------------------------------------------------------------------------------------------------------------------------------------------------------------------------------------------------------------------------------------------------------------------------------------------------------------------------------------------------------------------------------------------------------------------------------------------------------------------------------------------------------------------------------------------------|--------|--------|
| 16 | <i>Lenzites<br/>betulinus</i> (L.) Fr.                          | 088-19 | GTAGGTGAACCTGCGGAAGGATCATTAACGAGTTTTGAAAGGG<br>GGTTGTAGCTGGCCTTCCGAGGCATGTGCACGCCCTGCTCATCCC<br>ACTCTACACCTGTGCACTTACTGTAGGTCGGCGTGGGTTTCTAGC<br>CTCGGGTTTGAAGCATTCTGCTGGCCTATGTACATTTATAAACAC<br>TTTAAAGTAACAGAATGTAAACGCGTCTAACGCATTTTAATACAA<br>CTTTCAGCAACGGATCTCTTGGCTCTCGCATCGATGAAGAACGCA<br>GCGAAATGCGATAAGTAATGTGAATTGCAGAATTCAGTGAATCA<br>TCGAATCTTTGAACGCACCTTGCCTCCTTGGTATTCCGAGGAGC<br>ATGCCTGTTTGAGTGTGATGGAATTCTCAACCCATAAATCCTTGT<br>GATGTATGGGCTTGGATTGGAGGCTTGGTGGTCCCTTTCGGGA<br>TCGGCTCCTCTGAATATATTAGCTTGATTCCGTGCGGATCGGCT<br>CTCAGTGTGATAATTATCTACGCTGTGACCGTGAAGCGTTTGGCG<br>AGCTTCTAACCGTCTTTTTGGACAAACCTTATGACATCTGACCTC<br>AAATCAGTAGACACCCGCTGAACCTTAAGCATATCAATAAGCGGA<br>GGAAGTTCATTAACGAGTTTTGAAAGGGGTTGTAGCTGGCCTTC<br>CGAGGCATGTGCACGCTGCTCATCCACTCTACACCTGTGCACTT<br>ACTGTAAGTCGGCGTGGGTTTCTAGCCTCTGGGTTTGAACCATTC<br>CTCTGGCCAATGCCATTTATAACACCTTTAAGGTAACAGAATGA<br>TAAACGCTCTAACGCTTTTAATACATCTTCCACAAGGGATCTTTG<br>GGCTCCACCCCTTAAAAAACACCGAAAATGCATTAAGTAAAGG<br>TGAATGCACAAATTCAGGAAACCTCAAATCTTTAAACCCCTGCCC<br>CCTGGTTATTCCAAGAAACAAGCGGTTTGAGGTGTCCGGGAAAT<br>TCCCCAAAA                                                                                                                                                                                                                                                                                                                                                                                                                       | 871.73 | 97.55% |
| 17 | <i>Polyporus<br/>alveolaris</i> (DC.)<br>Bondartsev &<br>Singer | 096-19 | GCTTTATGAATTTGGAGGGGTCGATGTGAGCGCCGAACAGTCCT<br>TCCCAAGTCCCAGGCTTAAAGACCCAGAAAGGGTTTATAAGTG<br>AGGATTTTCTGAACACTCAAAACGGGTGCTTTCTGGAATACCCAA<br>GAGCCCAGGGGTAAAAAGTTTGAGTGATTCAAGACTTCTGCTATT<br>TCACATTAAGTACCGCATTGCGTGCTTTTTTAATGGCTGCAGAG<br>CCCAAAGTTTCTCGCGACAGTGTATATAGATGGTGATGGCCATA<br>CACTTTCTTTATTGAAGCGTGGTATATAAAGACAGGTAGGGGCA<br>AAAAGCCCCACGATACCCGACTATAAGTGCACGTGTAGAGGGAT<br>TGAGCAGGCTGCACTTGCCCCGAACGGCTAGCTACAACCCCGAC<br>TCCTATGGAGAACTTACCCCTCCGTAGGTGAACCTGCGGAAG<br>GATCATTATCGAGTTTGTATCGGGGTTGTAGCTGGCCTTTCGGGG<br>CATGTGCACGCCCTGCTCAATCCACTCTACACCTGTGCACTTATTG<br>TGGGTTTCGGGGGGCTTTTTGCCACTCGTACCTATGTTTATTACA<br>AACGCTTCAGTAAAGAATGTGTATTGCGATAACGCATCTATATA<br>CACTTTTCAGCAACGGATCTCTTGGCTCTCGCATCGATGAAGAAC<br>GCAGCGAAATGCGATAAGTAATGTGAATTGCAGAATTCAGTGAA<br>TCATCGAATCTTTGAACGCACCTTGCGCTCCTTGGTATTCCGAGG<br>AGCACGCTGTTTGAGTGTGATGAAATCATCAACTTATAAGCCTT<br>TCATGGGTCTGTAAGCTTGGACTTGGAGGCCTGTGCGCGGTCAA<br>CGTCGGCTCCTCTCAAATGTATTAGCTTGGTTCCTTGCAGATCGG<br>CTCCCGGTGTGATAATGTCTACGCTGTGACCGTGAAGCGTTTGGC<br>GAGCTTCTAATCGTCTCGTGAGAGACAGCTTCAATTGACTCTGACC<br>TCAAATCAGGCGGGACACCCGTAACCTTAAGCATATCAATAATTG<br>GAGAAAAAAAAGATCGTTCCGAGAGGAGTCCGGGTTGGAGGGT<br>GGCCTTTCGGGGCACGTGCCGCTGCTCAATCCCTTACCCTGTG<br>CACTTATAGTGGGTTTCCGGGGGGCTTTTTGCCCTCGTACCTATG<br>TTTATATACAAACGCTTCGTAAAAGAAAGTGTATTGCGATAACG<br>CATCTATTTATCACTCTCGCAACGGAGCTTTTGGCTCTGCACCCAT<br>CAAAAACCTACCCCACTGCGATTAGTTAATGTGCAATTGCATAAA<br>TTCCTGCAATCTCAAAACTTTTAACCCCTGGGCTCTTGCTATTCTA<br>GAATCACCCGTTTGAGTGTGAGAAAA | 778.22 | 94.51% |

|    |                                                  |        |                                                                                                                                                                                                                                                                                                                                                                                                                                                                                                                                                                                                                                                                                                                                                                                                                                                                                                                                                                                                                                                                                                                                                                                                                                                                                                                                                                                                                                                                                                                                                                                                                                                                                                                                      |        |        |
|----|--------------------------------------------------|--------|--------------------------------------------------------------------------------------------------------------------------------------------------------------------------------------------------------------------------------------------------------------------------------------------------------------------------------------------------------------------------------------------------------------------------------------------------------------------------------------------------------------------------------------------------------------------------------------------------------------------------------------------------------------------------------------------------------------------------------------------------------------------------------------------------------------------------------------------------------------------------------------------------------------------------------------------------------------------------------------------------------------------------------------------------------------------------------------------------------------------------------------------------------------------------------------------------------------------------------------------------------------------------------------------------------------------------------------------------------------------------------------------------------------------------------------------------------------------------------------------------------------------------------------------------------------------------------------------------------------------------------------------------------------------------------------------------------------------------------------|--------|--------|
| 18 | <i>Stereum hirsutum</i><br>(Willd.) Pers.        | 073-18 | GAGGGCAAAGTTCGATGAAAAGCTGTCCTTTCGGACGGTTAGAA<br>AGCGCTCTCCACCGAAGCAAGCACACCACAGCGTAGATAATTA<br>TCACACCGAGGCCACGTCGCAACAAGACGCACTAATGCATTG<br>AGAGGAGCCGAGCGGTGAAGCCCGCAAAGCCTCCAAGTCCAA<br>TCCACTACGTTCAAAAAGTGAAGAGGGTTGAGAATTTACGAC<br>ACTCAAACAGGTGTGCCCTTCGGAATACCAAAGGGCGCAAGGTG<br>CGTTCAAAGATTGATGATTCACTGAATTCTGCAATTCACATTACT<br>TATCGCATTTGCTGCGTTCTTCATCGATGCGAGAGCCAAGAGAT<br>CCGTTGTTGAAAGTTGTATTAGATGCGTTTTATTACATCGAGTAG<br>ACATTCTTAAGACATACAAAAGGTGTGTAAAGGGACGCGAGCCT<br>CCTCAAATAACCAAAAAACACCCGCGAAAAGTGCGCACGTGTGT<br>GTGTGGAATAGAAAGGAGAGCGCGCATGTGGCGTTTATAGGCG<br>ACATATACCTCTCCACACATATATTTATAAGAGATCTCCGCACGT<br>GCACCCACGAAGAG                                                                                                                                                                                                                                                                                                                                                                                                                                                                                                                                                                                                                                                                                                                                                                                                                                                                                                                                                                                                                                                                            | 727.50 | 94.52% |
| 19 | <i>Terana caerulea</i><br>(Schr. ex Lam.) Kuntze | 177-19 | GGCCAGCCGCGACCTTCCAAGGTTCCAAGGCTTTCCAAACCAAT<br>AAAAGGGAAGGTGGAAGGTCCCTGACCACTCCAAACCGGCTGC<br>TTCTTGAAATACCCAAGAGCGCGAGTGCGTGCGAGTTTGGTG<br>ATTTACAGGAATTTTGTGCAATTTACCATTAACTGATCGCACTTC<br>GGTGCTTTCTTAATCGATGCGAGCCCCAAAGATCCGTTGCGAAA<br>GTGGTATATAATGCTTATAAGCCAGATGACTTTTCTATAACTGAA<br>GCGTGTGTGAGAAGACATAGAGTGCTCGCTAGCGCACCGAAGC<br>GCAGCCGTTACCTTTCTACAATGAGGCACAGAGGGGAGAGGG<br>GTGAGCCAGGGGCACATGCCCCGAGAGGCCAGCGACAACCCT<br>TTCAAACCCCATAAATTGATCCTTCGTAAGGGTGACCTGCGGAA<br>GGTCATTATCAGTTTGACGGGTTGTCGCTGGCCTCCTCGCGGG<br>CATGTGCACACCTGGCTCATCCACTCTCCACCTCTGTGCACTCATT<br>GTAGAATGGTGAACGGCTGCGCTTCGGTGCGGCTAGAAGCCACT<br>CTATGTCTTATTACACACGCTTCAGTTATAGAATGTCATCTTGCGT<br>ATAACGCATTATATACACTTTCAGCAACGGATCTCTTGCTCTC<br>GCATCGATGAAGAACGCAGCGAAATGCGATAAGTAATGTGAATT<br>GCAGAATTCAGTGAATCATCGAATCTTTGAACGCACCTTGCGCTC<br>CTTGATTCCGAGGAGCACGCTGTTTGAGTGTCATGGACTTCT<br>CAACCTTCCACTTATTGTTGGAGGCTTGGACTTGGAGGTGCTGC<br>TGGCTCTCGTAGTCGGCTCCTCTGAAATGTATTAGCGTGAACGTT<br>ACGGATCGCTTCAGTGTGATAATTATCTGCGCTGTTGTGTTGAAG<br>TATAGTCAGCTTGCCTTCTAATCGTCCTCACGGACACTATATTGA<br>CAATCTGACCTCAATCAGGCGGGACTACCCGCTGAACCTTAAGC<br>ATATCAATAAGCCGGAGGAAATCAATATCGAGTTTGAACGGGT<br>TGTCGCTGGCCTCTCCGGGGCATGTGCACACCTGGCTCATCCACT<br>CTCCCTCTGTGCACTCATTGTAGAATGGTGAACGGCTGCGCTTC<br>GGTGCGGCTAGAAGCACTCTATGTCTTCTACACACGCTTCATT<br>ATAGAATGTCATCTTGCTTATAAGCATTATATACACTTTCGCAAC<br>GGATCTCTTGCTCTGCATCGATGAAGAAGCACCGAAATGCGAT<br>AAGTTAATGTGAAATTGCAGAAATTCATGGAAATCTCAAATCTCT<br>GAAGCCCTTGGCCTCTTGTTATTCCAGGAGCAGCGTTTTGAGT<br>GTCAGGGACTTCTCCCTCCCTTTATTGGTTGGAAGGCTTGGGAC<br>TTGGAAGGTGCTGCTGGGCTCCTAAATCGCCCCCTGAAATGGT<br>ATTTAGCGTGGAAGCTTTACGGAATCCTTCCTGTGGATAAAATTA<br>ACTGGCCCGGTGGGGTTTGAAGATAAAAAATCAAACCTG | 911.35 | 95.06% |
| 20 | <i>Trametes hirsuta</i> (Wulfen)<br>Pilát        | 067-18 | GTTGTTGCTGGCCTTCCGAGGCATGTGCCCTGCTCATCCACTCTA<br>CATGTAGTTGGCGTGGGTTTCTAGCCTCCGGCTGAAGCATTCTG<br>CCGGCCTATGTACACTACAACTCTTAAAGTATCAGAATGTAAAC<br>GCGTCTAACGCATCTTAATACAACCTTTCAGCAACGGATCTCTTG<br>CTCTCGCATCGATGAAGAACGCAGCGAAATGCGATAAGTAATGT<br>GAATTGCAGAAATTCAGTGAATCATCGAATCTTTGAACGCACCTTG<br>CGCTCCTTGGTATTCCGAGGAGCATGCCTGTTTGAGTGTGATGAA<br>ATTCTCAACCCATAAATCCTTGATCTATGGGCATGGAT                                                                                                                                                                                                                                                                                                                                                                                                                                                                                                                                                                                                                                                                                                                                                                                                                                                                                                                                                                                                                                                                                                                                                                                                                                                                                                                                          | 456.47 | 98.79  |

|    |                                            |        |                                                                                                                                                                                                                                                                                                                                                                                                                                                                                                                                                                                                                                                                              |        |        |
|----|--------------------------------------------|--------|------------------------------------------------------------------------------------------------------------------------------------------------------------------------------------------------------------------------------------------------------------------------------------------------------------------------------------------------------------------------------------------------------------------------------------------------------------------------------------------------------------------------------------------------------------------------------------------------------------------------------------------------------------------------------|--------|--------|
| 21 | <i>Trametes<br/>suaveolens</i> (L.)<br>Fr. | 070-18 | CCTGCGGAAGGATCATTAAACGAGTTTTGAAACGGGTTGTGCTGG<br>CCTTCCGAGGCATGTGCACGCCCTGCTCATCCACTCTACACCTGT<br>GCACCTACTGTAGGTTGGCGTGGGCTCCTTCGCGGGAGCGTTCT<br>GCCGGCCTATGTATATTACAAACCCCTTAAAGAAACAGAATGTAA<br>ACGCGTCTAACGCATCTTAATACAACCTTTAGCAACGGATCTCTT<br>GGCTCTCGCATCGATGAAGAACGCAGCGAAATGCGATAAGTAAT<br>GTGAATTGCAGAATTCAGTGAATCATCGAATCTTTGAACGCACCT<br>TGCCTCCTTGGTATTCCGAGGAGCATGCCTGTTTGAGTGTCATG<br>AAATTCTCAACCCGTAAATCCTTGTGATCTACGGGCTTGGACTTG<br>GAGGCTTGCTGGCCCTTGCGGTCGGCTCCTCTTGAATGCATTAGC<br>TTGATTCCGTATGGATCGGCTCTCAGTGTGATAATTGTCTACGCT<br>GTGACCGTGAAGTGTTTTGGCGAGCTTCTAACCGTCTGTTAGGAC<br>AACTTTTAAACATCTGACCTCAAATCAGGTAGGACTACCCGCTGA<br>ACTTAACCATATCAGTAA | 874.90 | 99.82% |
|----|--------------------------------------------|--------|------------------------------------------------------------------------------------------------------------------------------------------------------------------------------------------------------------------------------------------------------------------------------------------------------------------------------------------------------------------------------------------------------------------------------------------------------------------------------------------------------------------------------------------------------------------------------------------------------------------------------------------------------------------------------|--------|--------|
